# Supplementary material for: A Stereoselective Entry to Enantiopure (S)-2-Amino-2-methyl-5-arylpent-4-ynoic Acids and Evaluation of Their Inhibitory Activity against Bacterial Collagenase G
Source: MDPI journal article supplement (doi:10.3390/sym15101924), 2023-10-16
Supplement: s1 [file s1]

## Supporting Information

### **A Stereoselective Entry to Enantiopure (S)-2-Amino-2-methyl-5-arylpent-4-ynoic Acids and Evaluation of Their Inhibitory Activity Against Bacterial Collagenase G**

**Hegine I. Hakobyan <sup>1</sup>, Silva M. Jamgaryan <sup>1</sup>, Armen S. Sargsyan <sup>1</sup>, Yuri M. Danghyan <sup>1</sup>, Vladimir A. Larionov <sup>2,3,\*</sup>, Victor I. Maleev <sup>2</sup>, Ashot S. Saghyan <sup>1</sup> and Zorayr Z. Mardiyani <sup>1,4,\*</sup>**

<sup>1</sup> Scientific and Production Center "Armbiotechnology" of NAS RA, Gyurjyan Str. 14, Yerevan 0056, Armenia; armenssargsyan@gmail.com (A.S.S.)

<sup>2</sup> A.N. Nesmeyanov Institute of Organoelement Compounds of Russian Academy of Sciences (INEOS RAS), Vavilov Str. 28, Bld. 1, 119334 Moscow, Russia

<sup>3</sup> Faculty of Science, Peoples' Friendship University of Russia (RUDN University), Miklukho-Maklaya Str. 6, 117198 Moscow, Russia

<sup>4</sup> Scientific Technological Center of Organic and Pharmaceutical Chemistry of NAS RA, Azatutian Ave. 26, Yerevan 0014, Armenia

\* Correspondence: larionov@ineos.ac.ru (V.A.L.); zmardiyani89@gmail.com (Z.Z.M.)

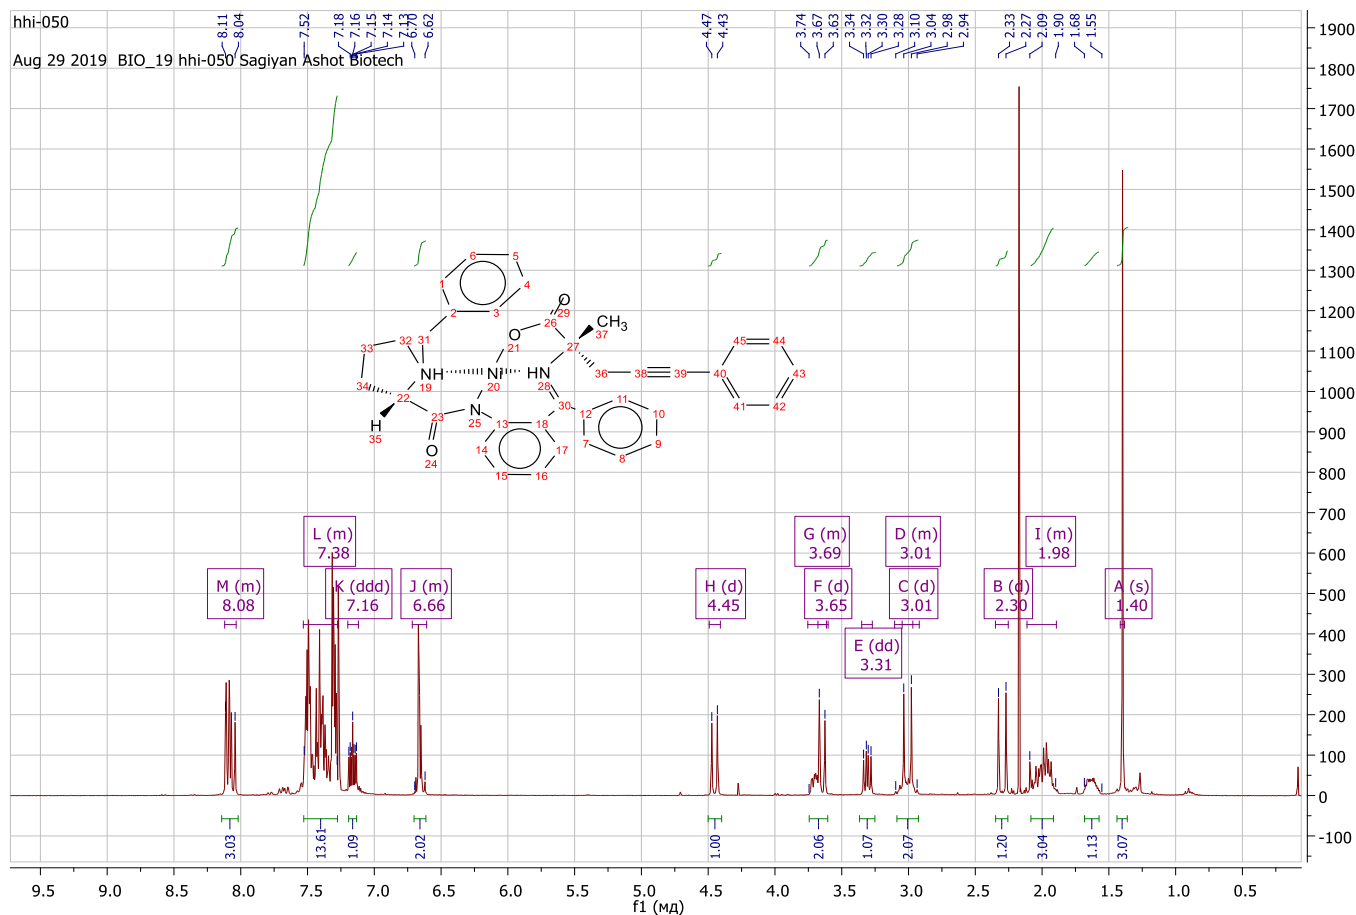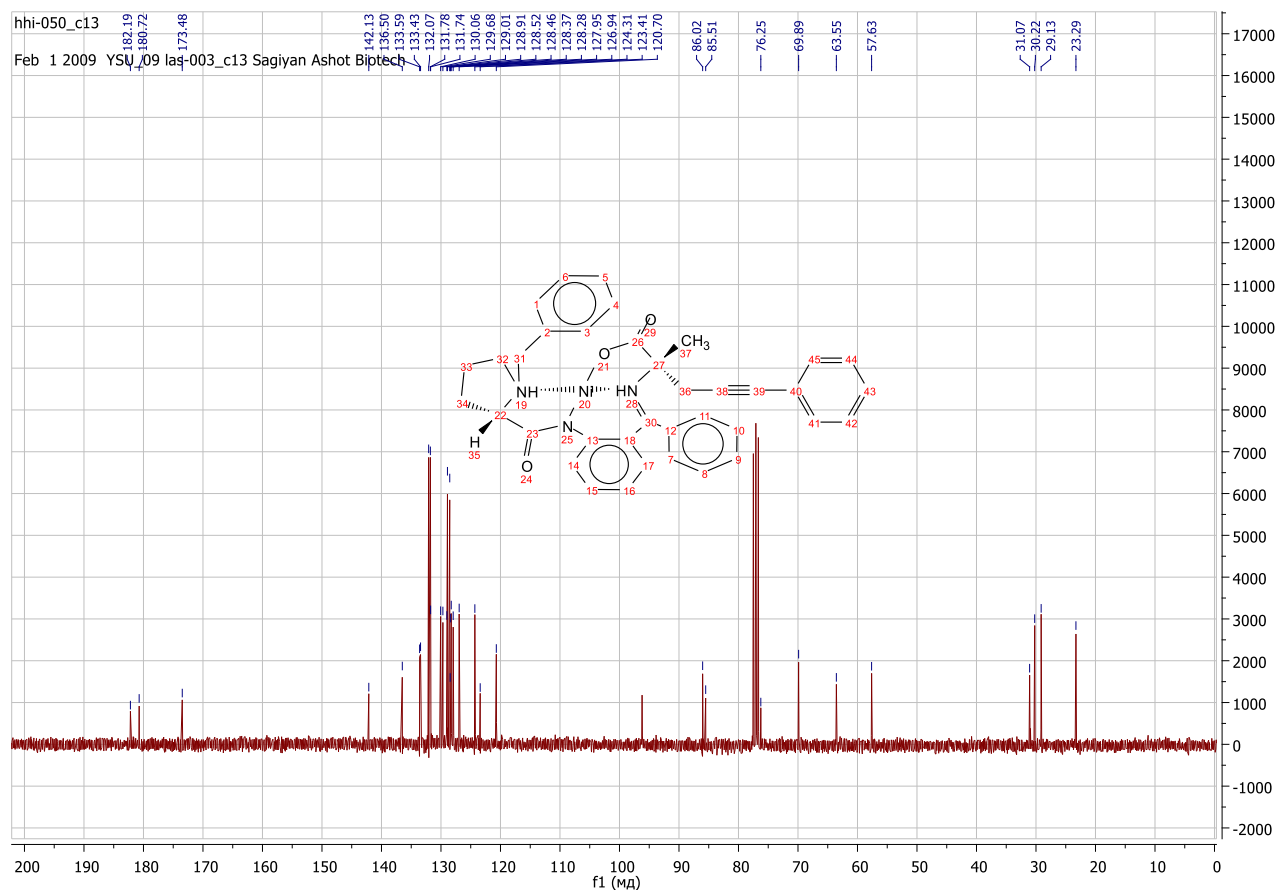

**Figure S1.** <sup>1</sup>H (300 MHz) and <sup>13</sup>C (75 MHz) NMR spectra of the Ni(II) complex **2a** (in CDCl<sub>3</sub>)

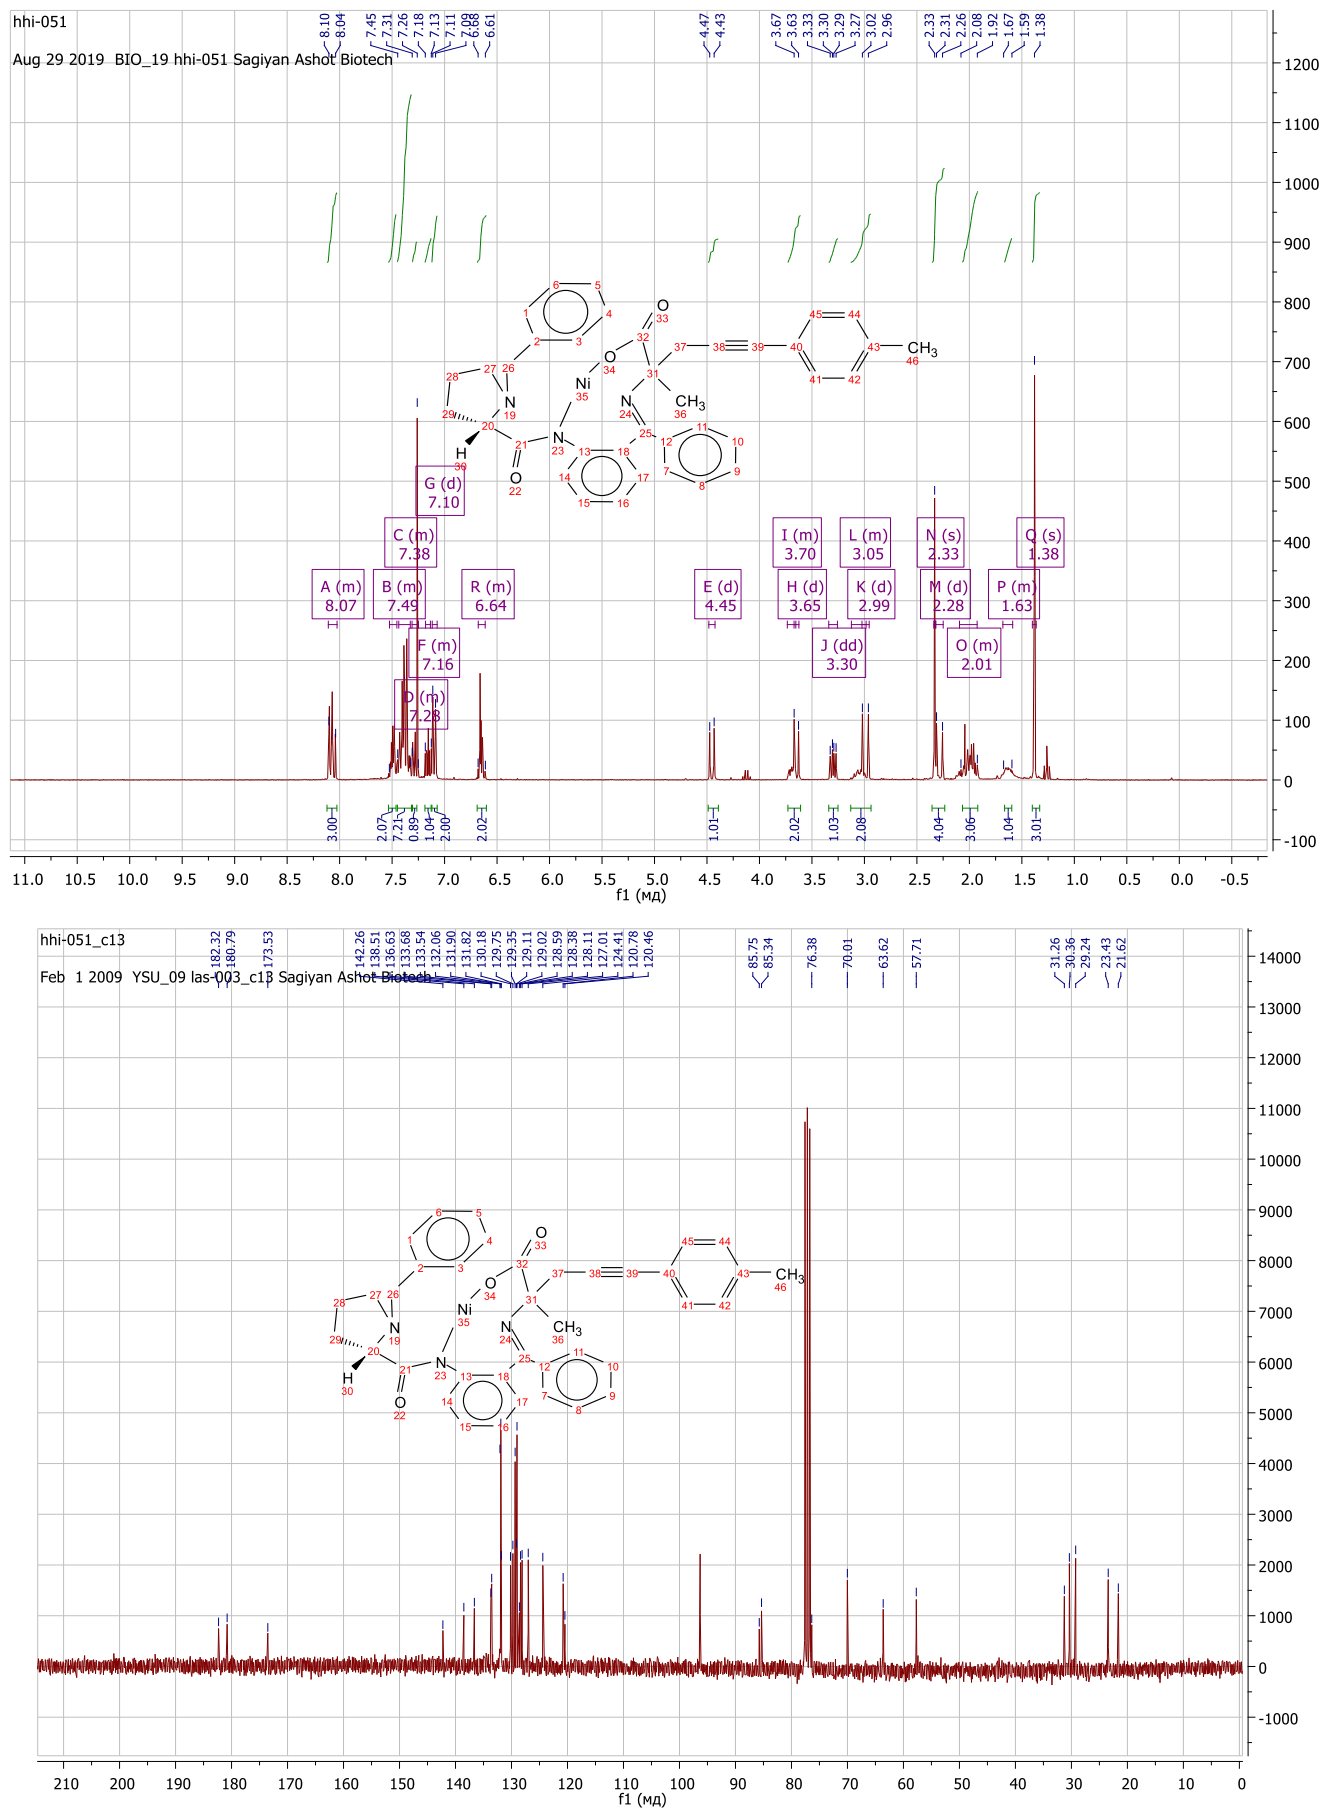

**Figure S2.** <sup>1</sup>H (300 MHz) and <sup>13</sup>C (75 MHz) NMR spectra of the Ni(II) complex **2b** (in CDCl<sub>3</sub>)

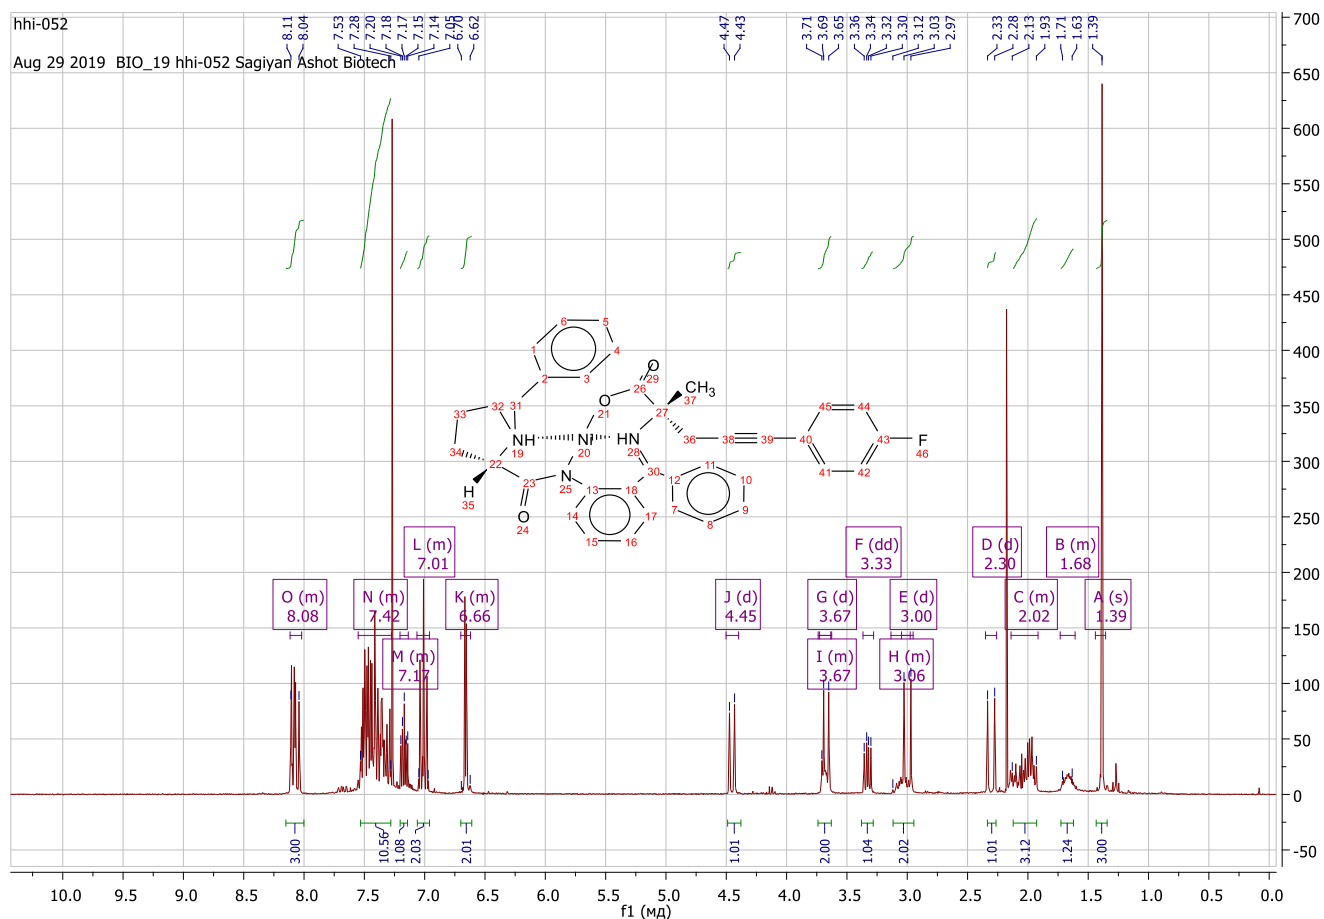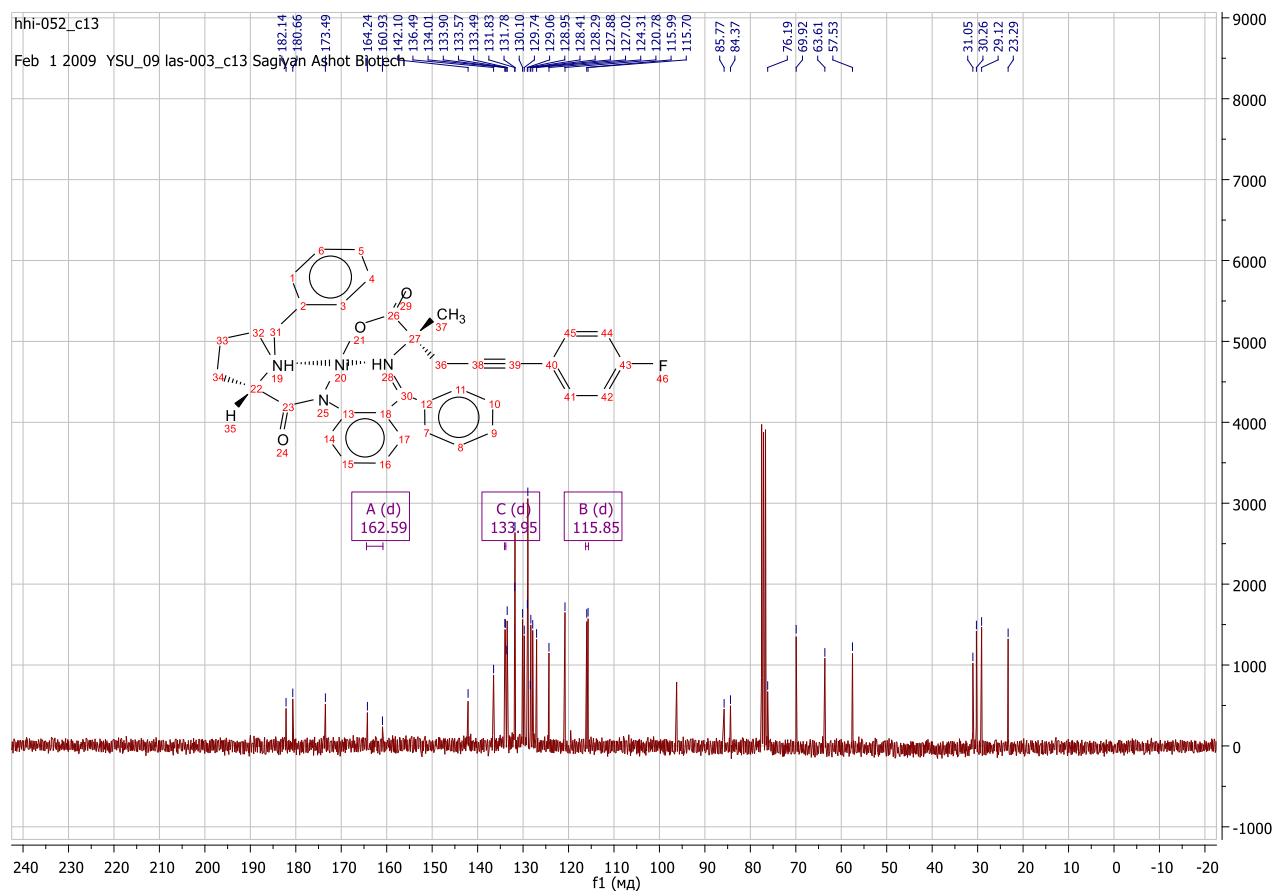

**Figure S3.** <sup>1</sup>H (300 MHz) and <sup>13</sup>C (75 MHz) NMR spectra of the Ni(II) complex **2c** (in CDCl<sub>3</sub>)

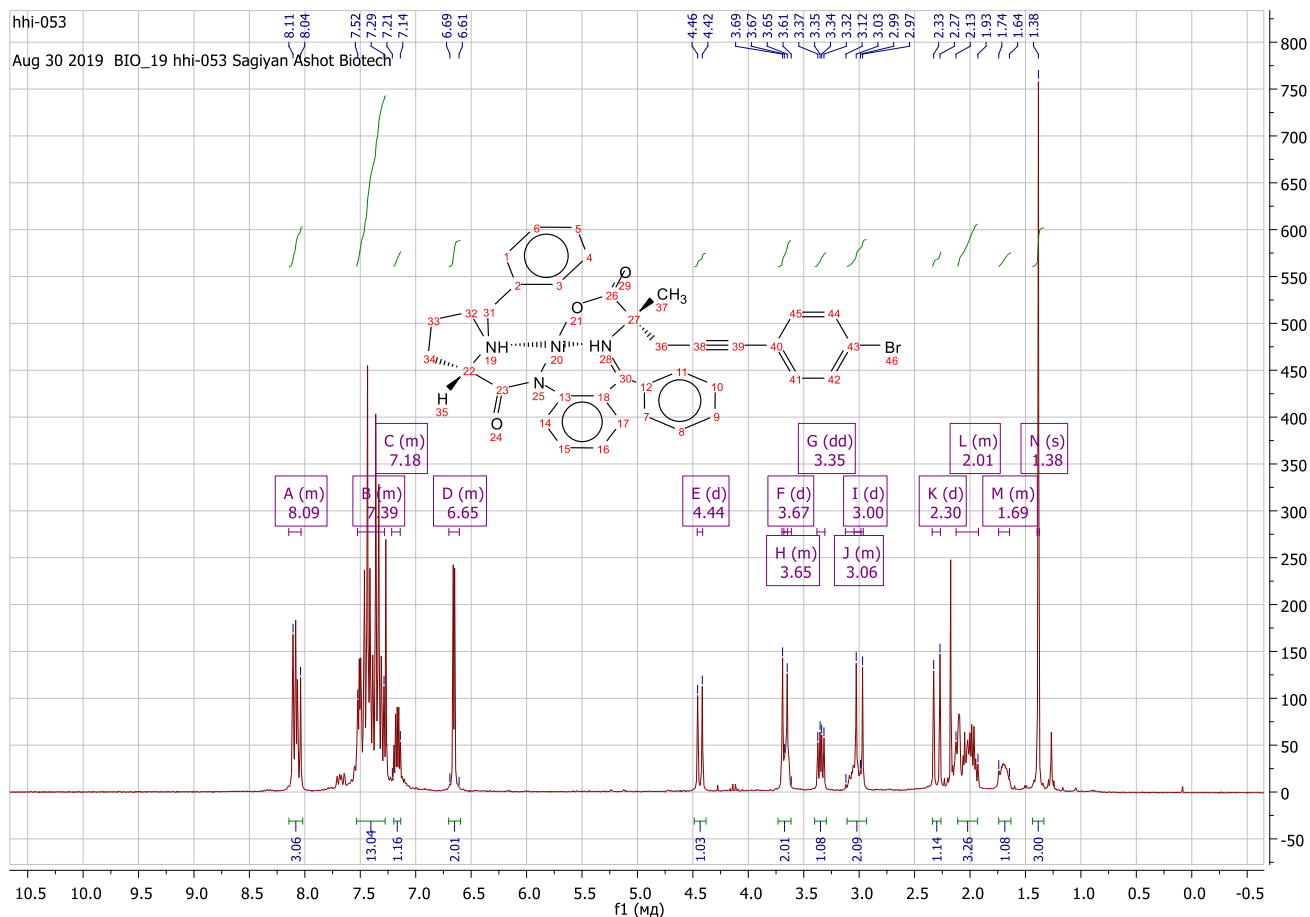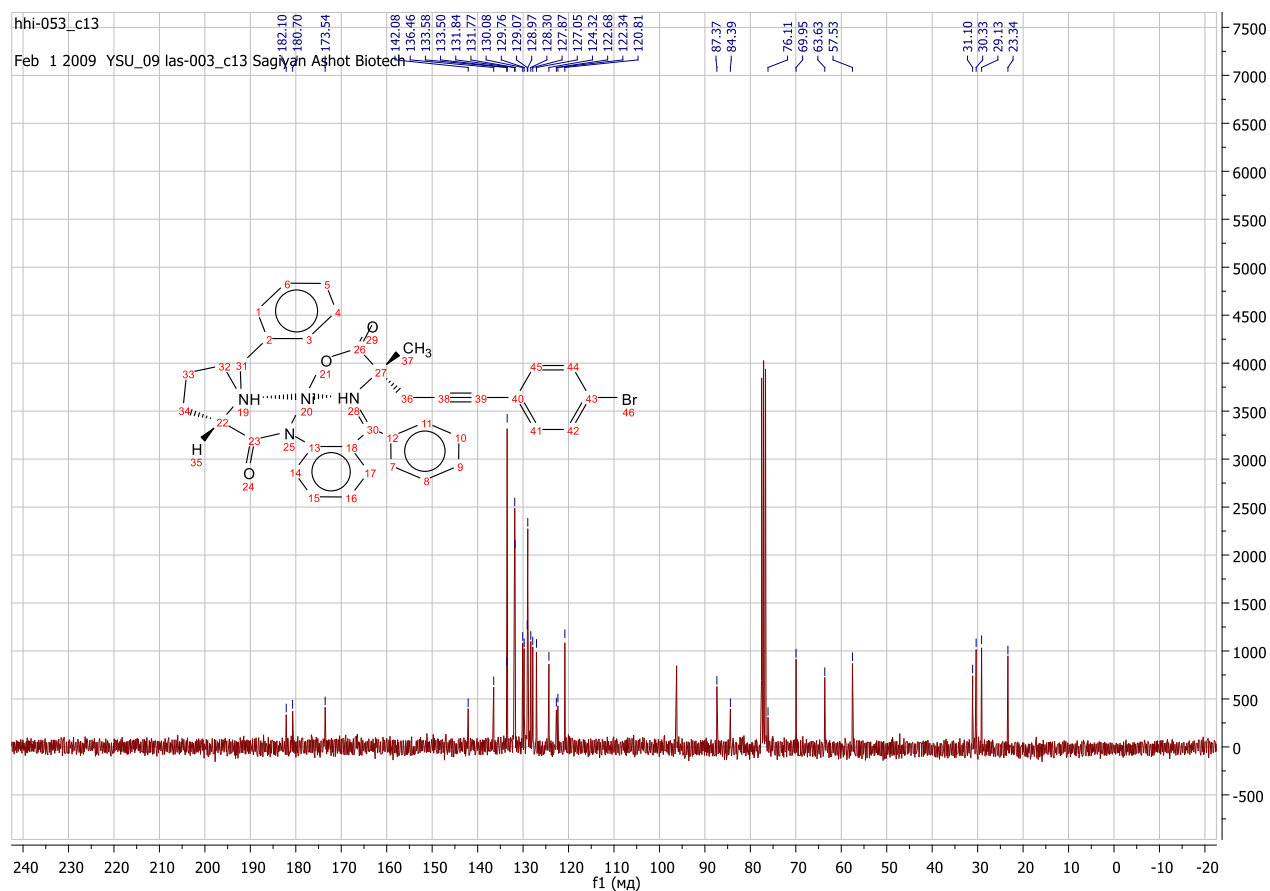

**Figure S4.** <sup>1</sup>H (300 MHz) and <sup>13</sup>C (75 MHz) NMR spectra of the Ni(II) complex **2d** (in CDCl<sub>3</sub>)

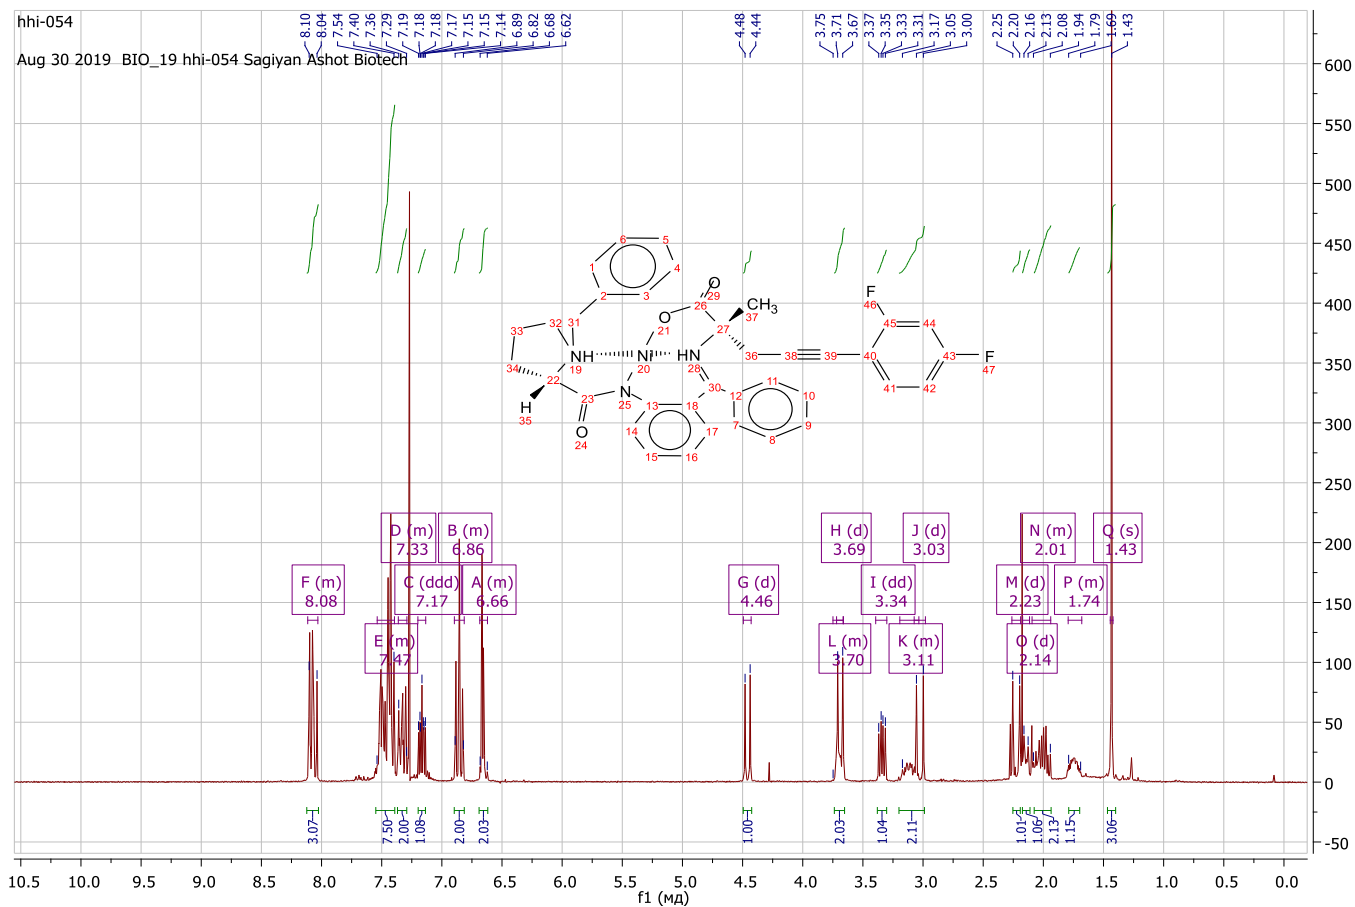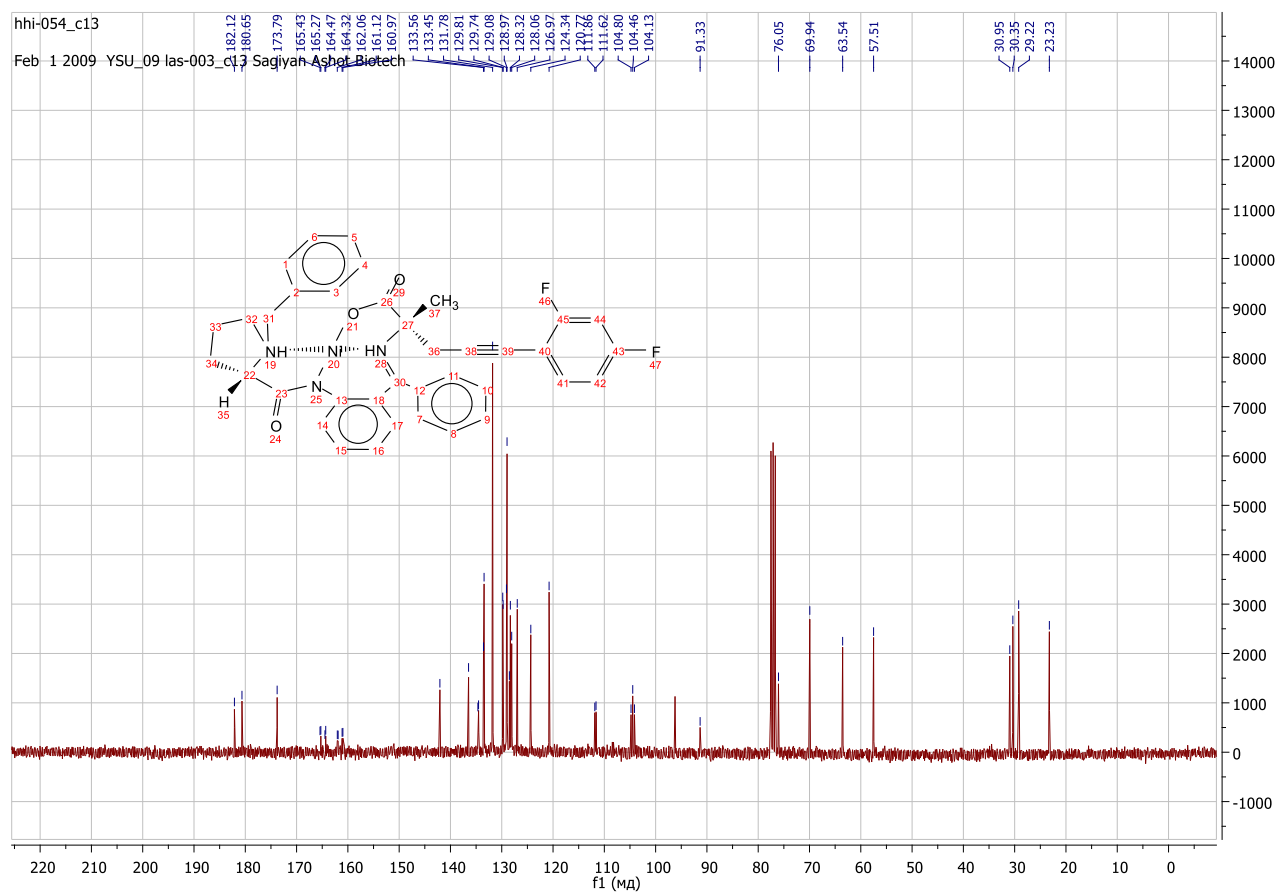

**Figure S5.** <sup>1</sup>H (300 MHz) and <sup>13</sup>C (75 MHz) NMR spectra of the Ni(II) complex **2e** (in CDCl<sub>3</sub>)

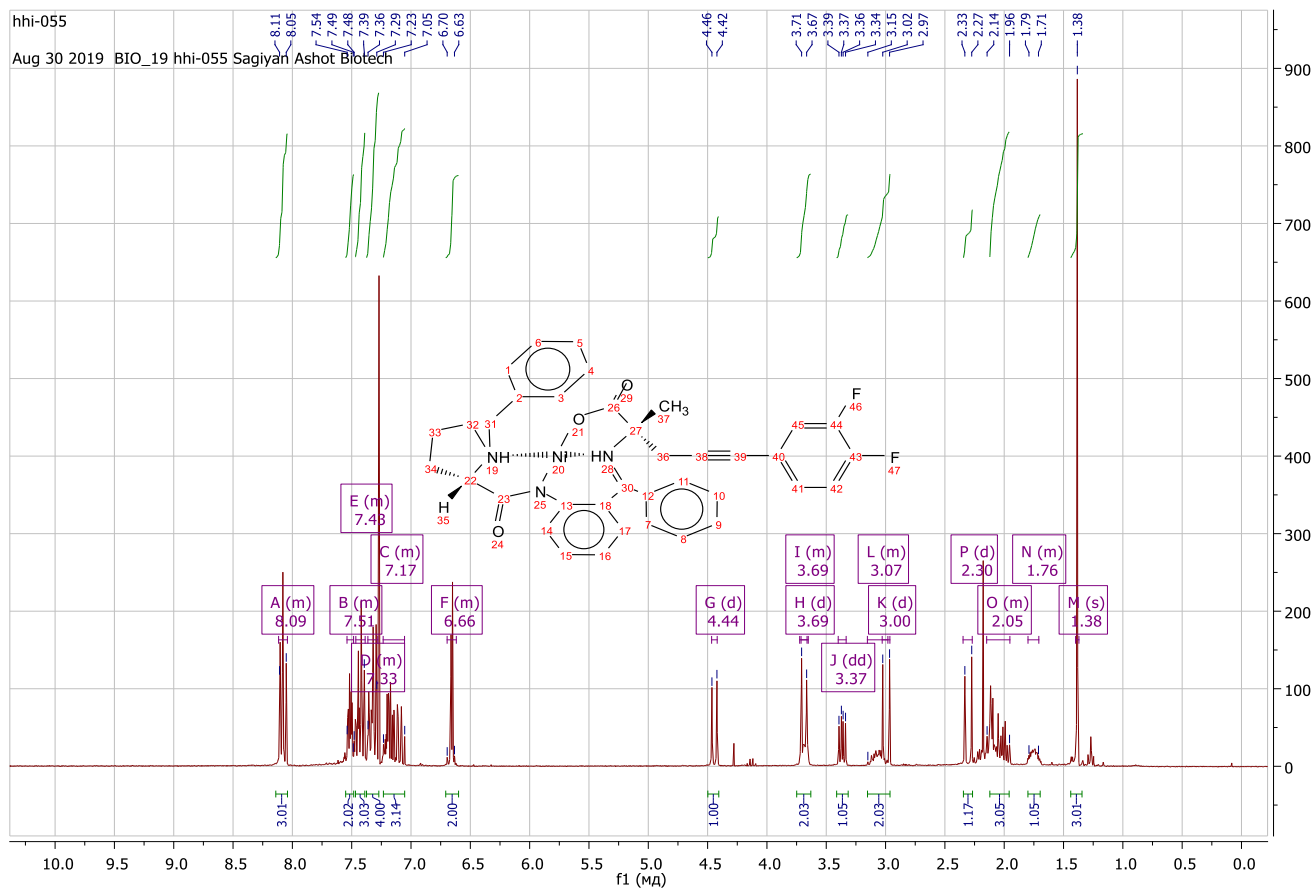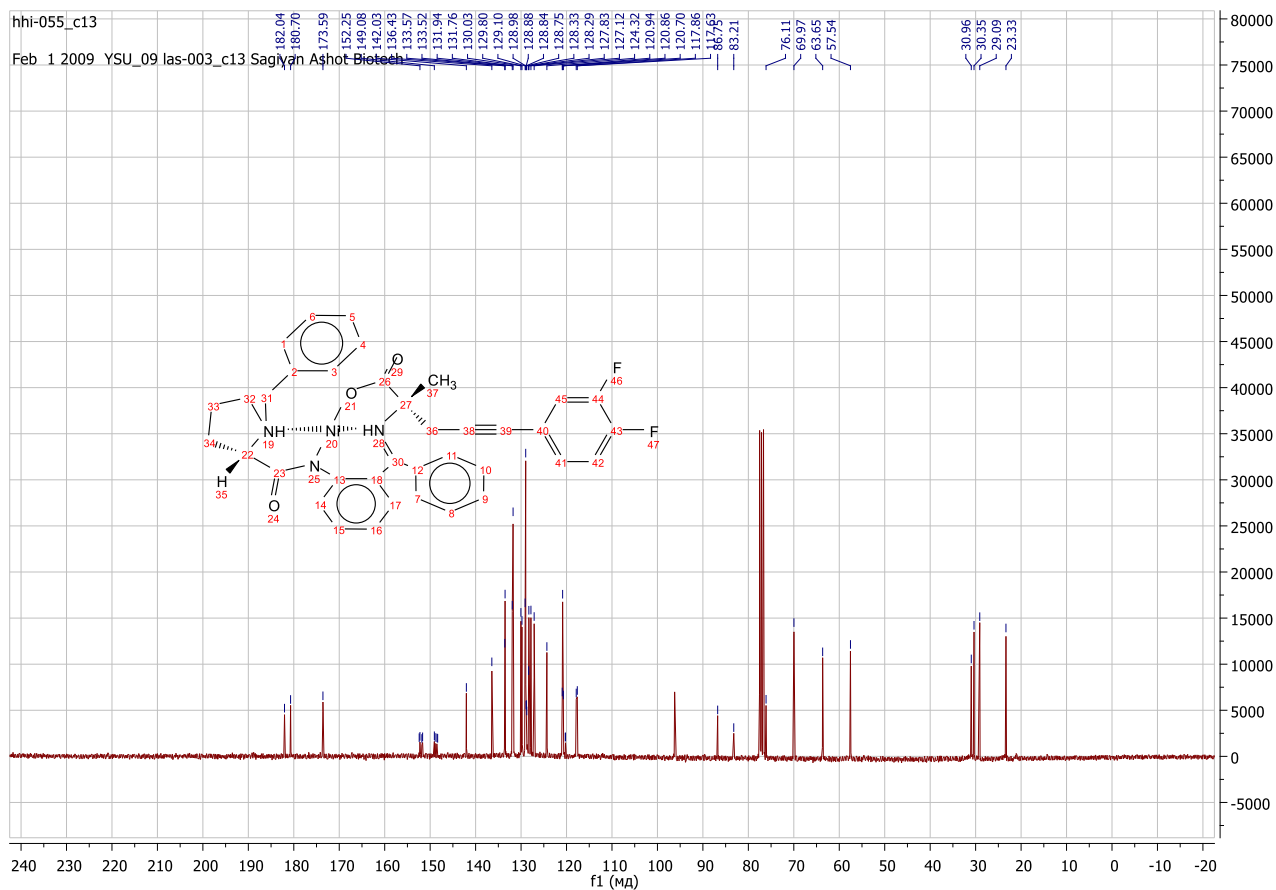

**Figure S6.**  $^1\text{H}$  (300 MHz) and  $^{13}\text{C}$  (75 MHz) NMR spectra of the Ni(II) complex **2f** (in  $\text{CDCl}_3$ )

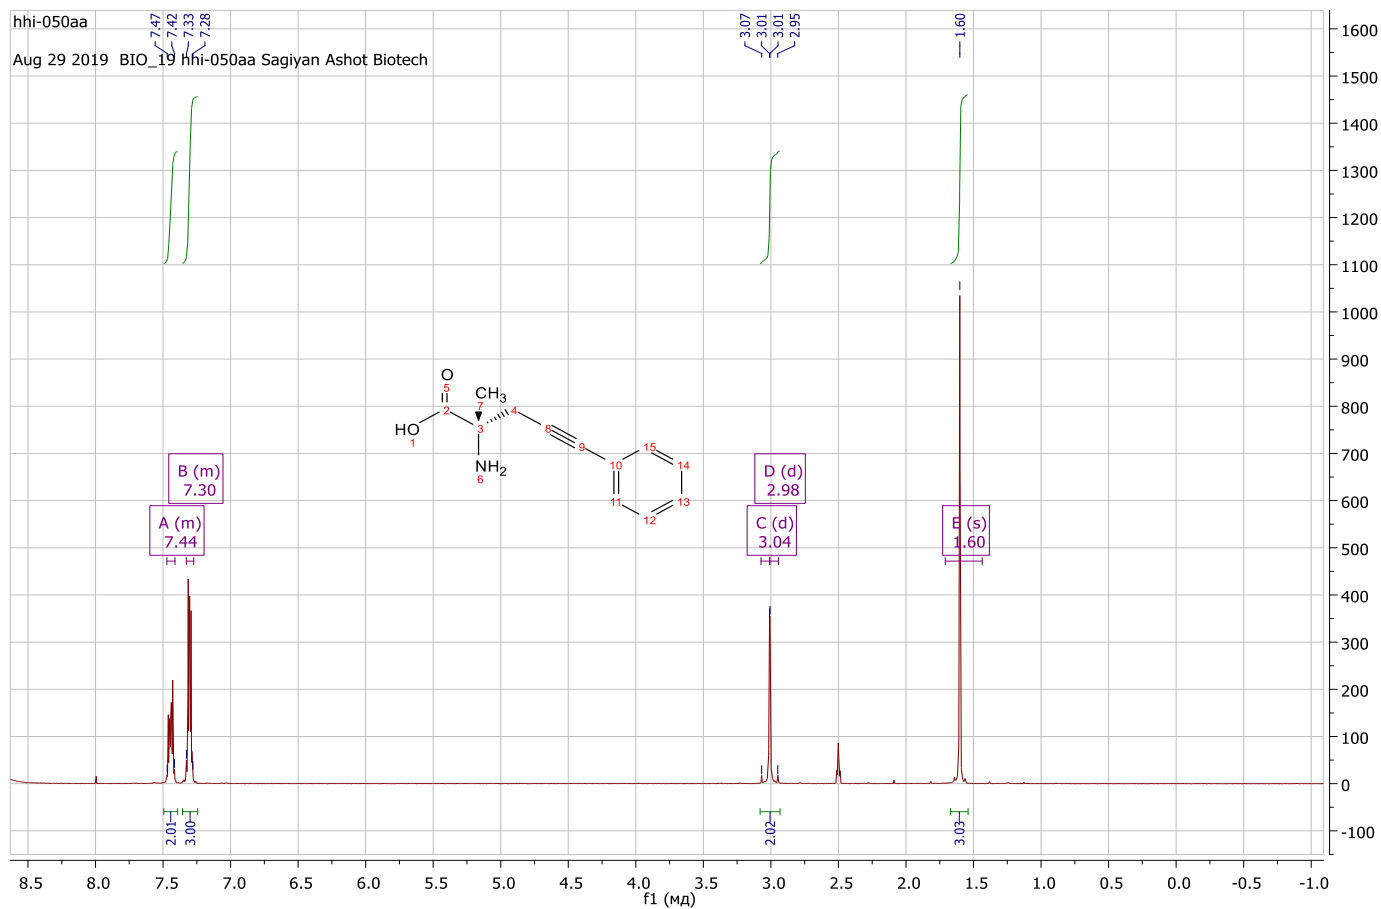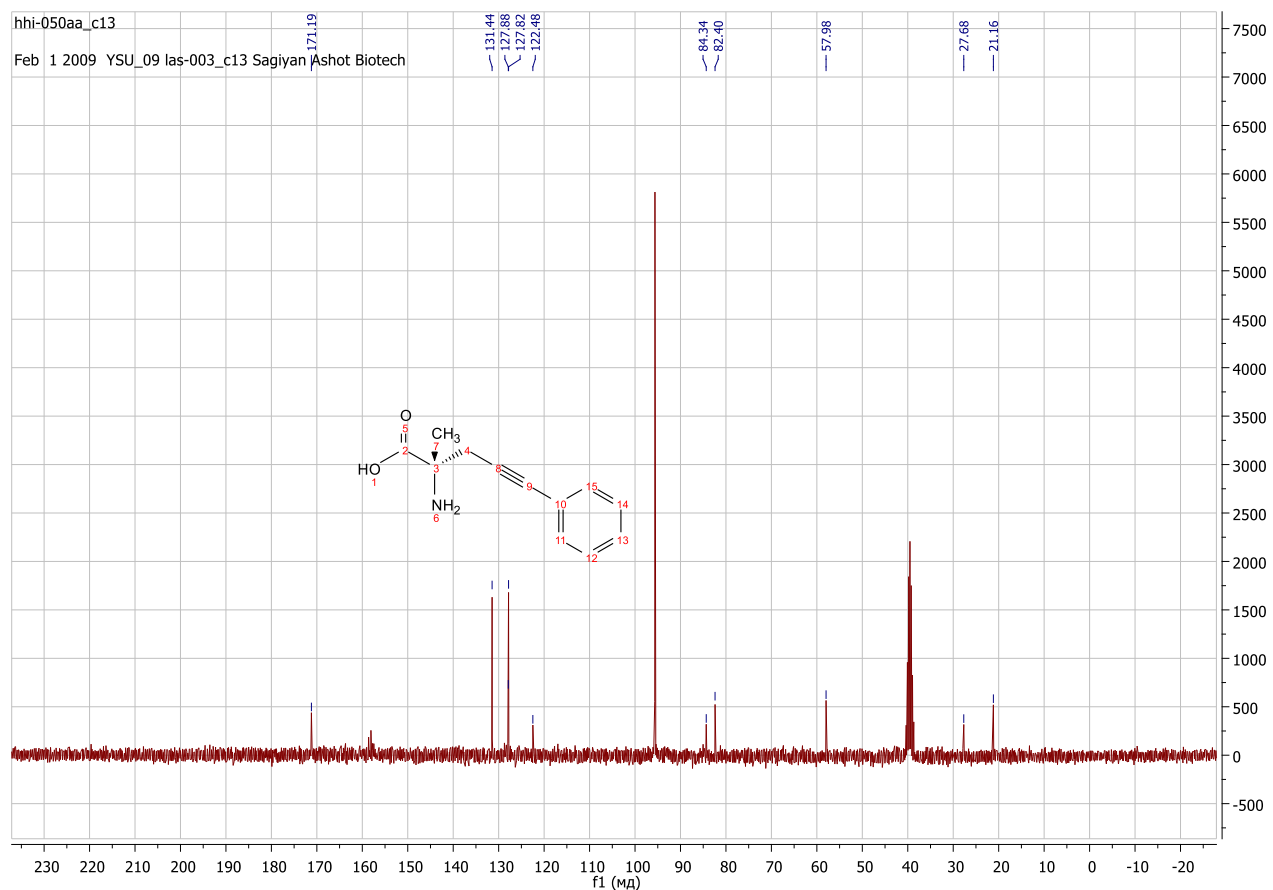

**Figure S7.** <sup>1</sup>H (300 MHz) and <sup>13</sup>C (75 MHz) NMR spectra of AA **3a** (in DMSO-d<sub>6</sub>+CCl<sub>4</sub>+CF<sub>3</sub>COOD)

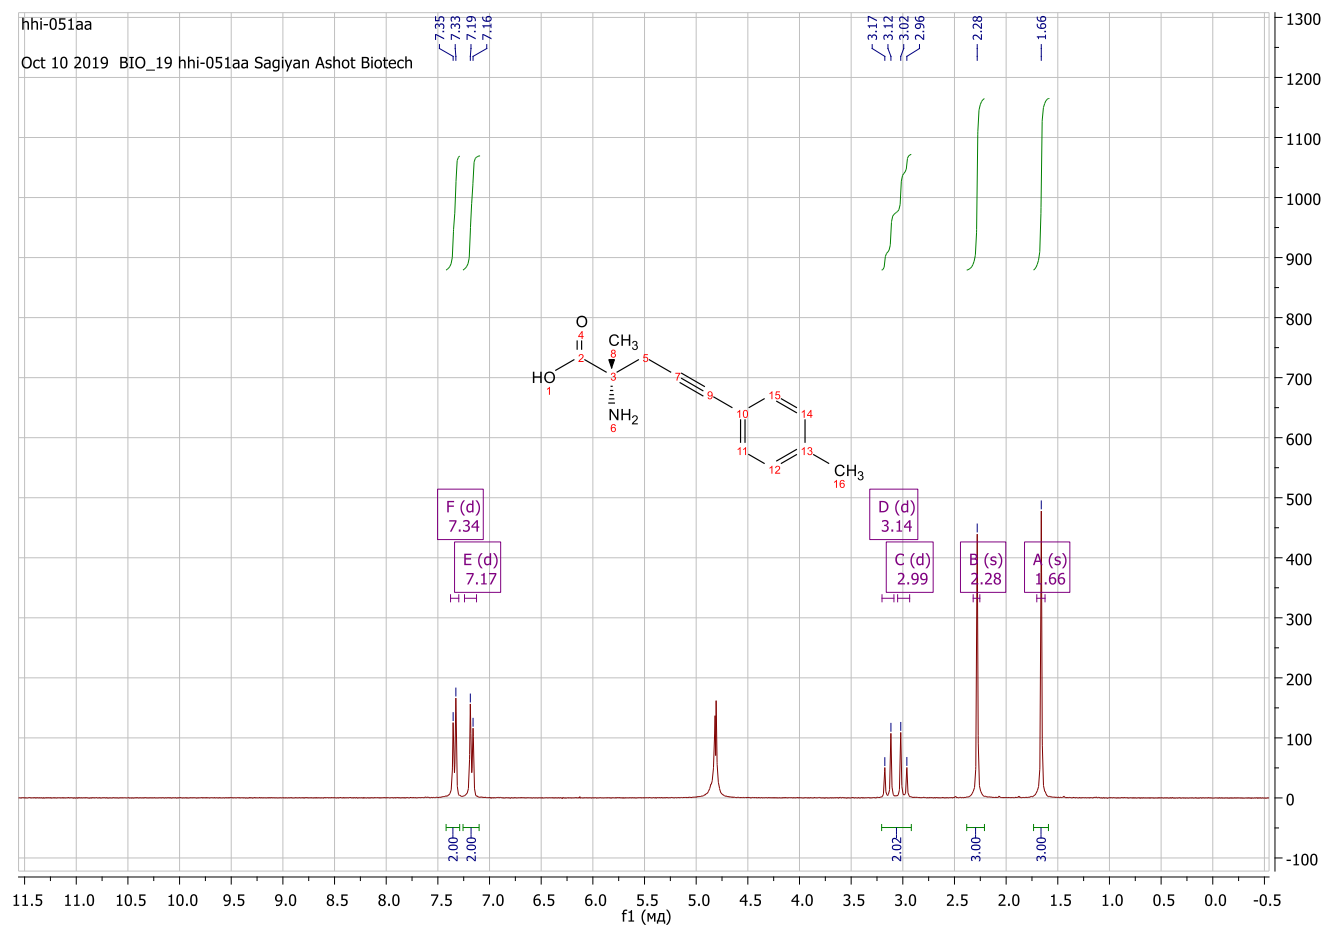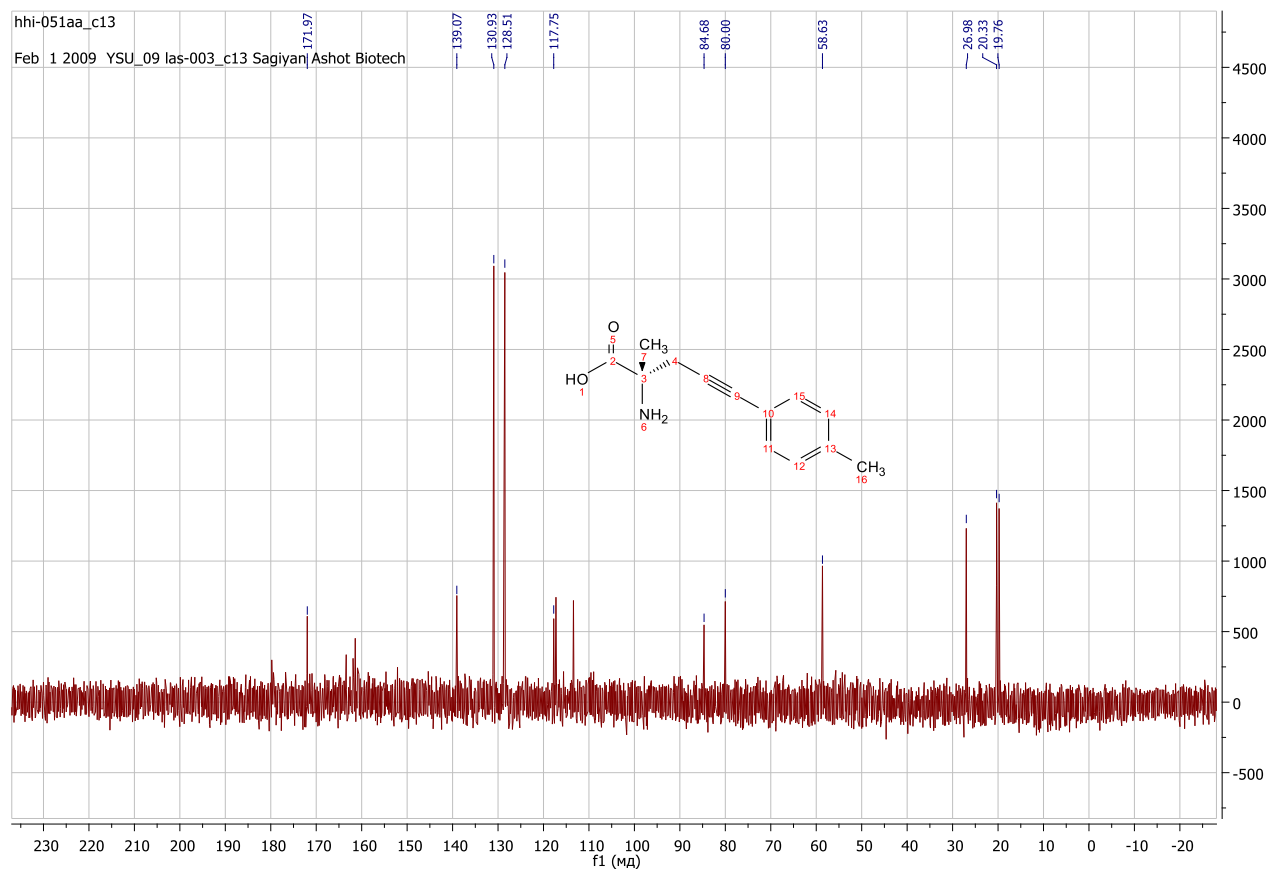

**Figure S8.** <sup>1</sup>H (300 MHz) and <sup>13</sup>C (75 MHz) NMR spectra of AA **3b** (in D<sub>2</sub>O+CF<sub>3</sub>COOD)

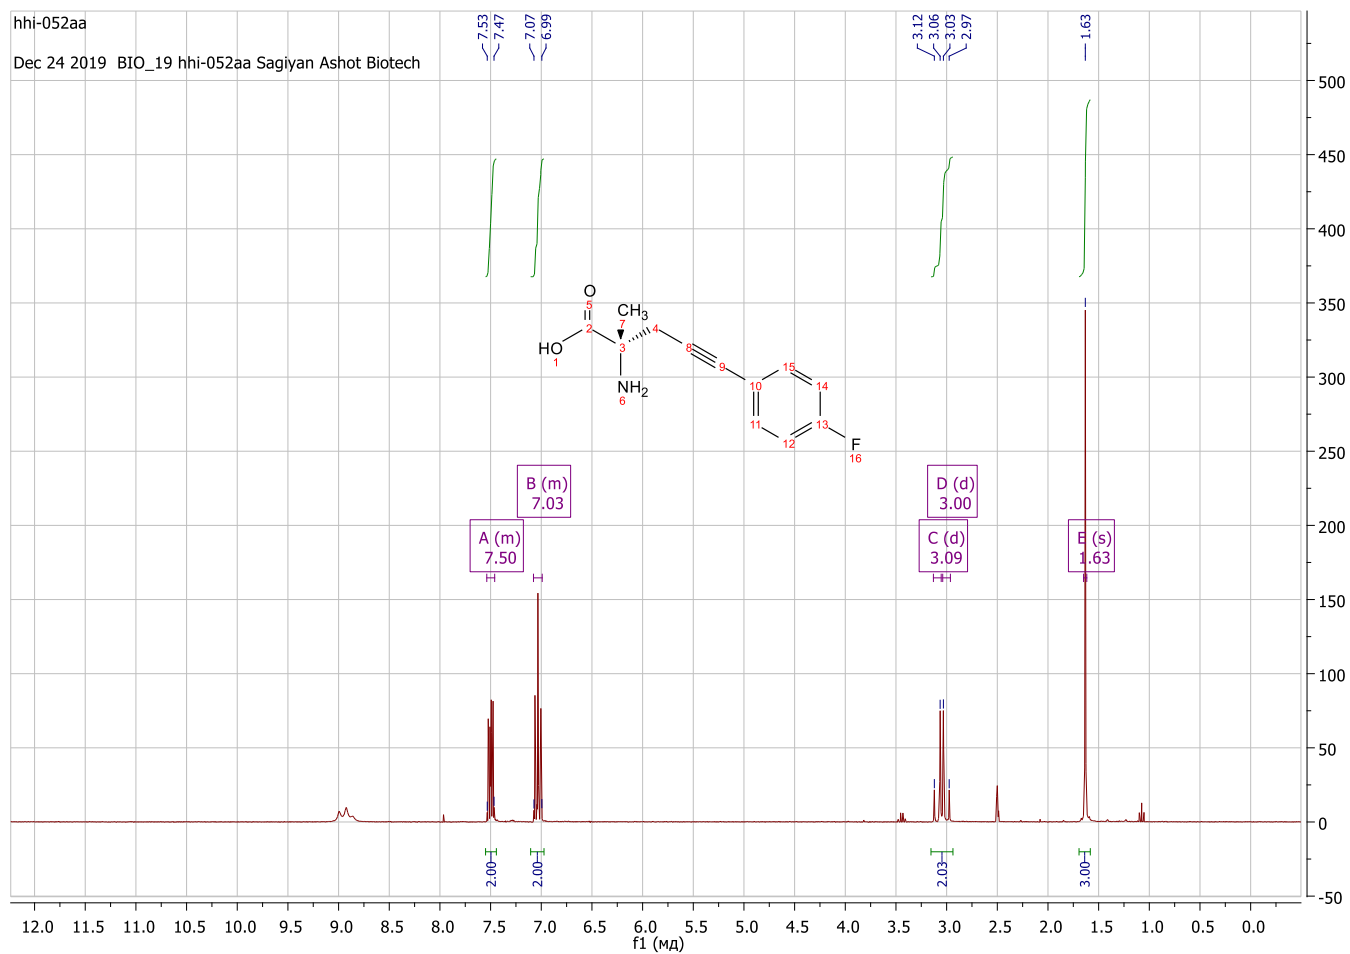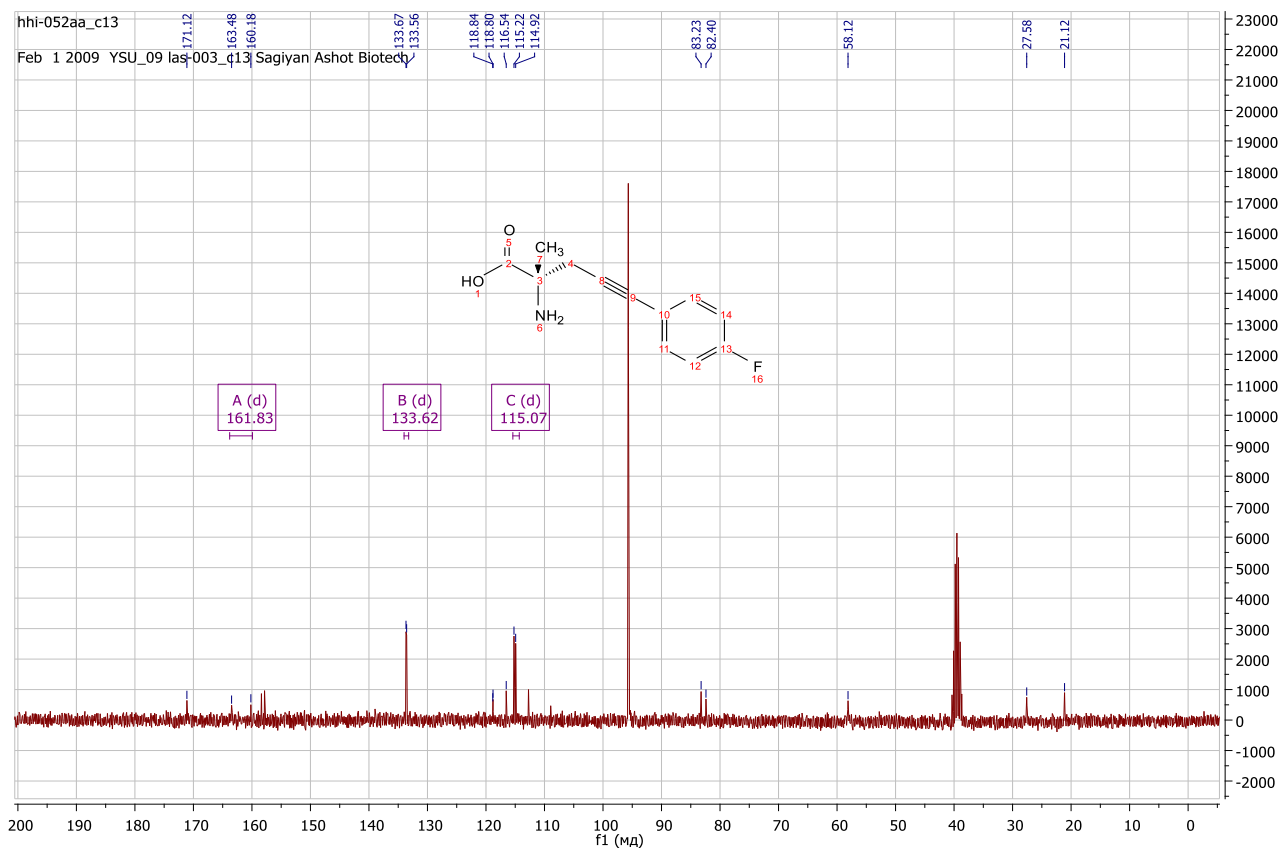

**Figure S9.** <sup>1</sup>H (300 MHz) and <sup>13</sup>C (75 MHz) NMR spectra of AA 3c (in DMSO-d<sub>6</sub>+CF<sub>3</sub>COOD)

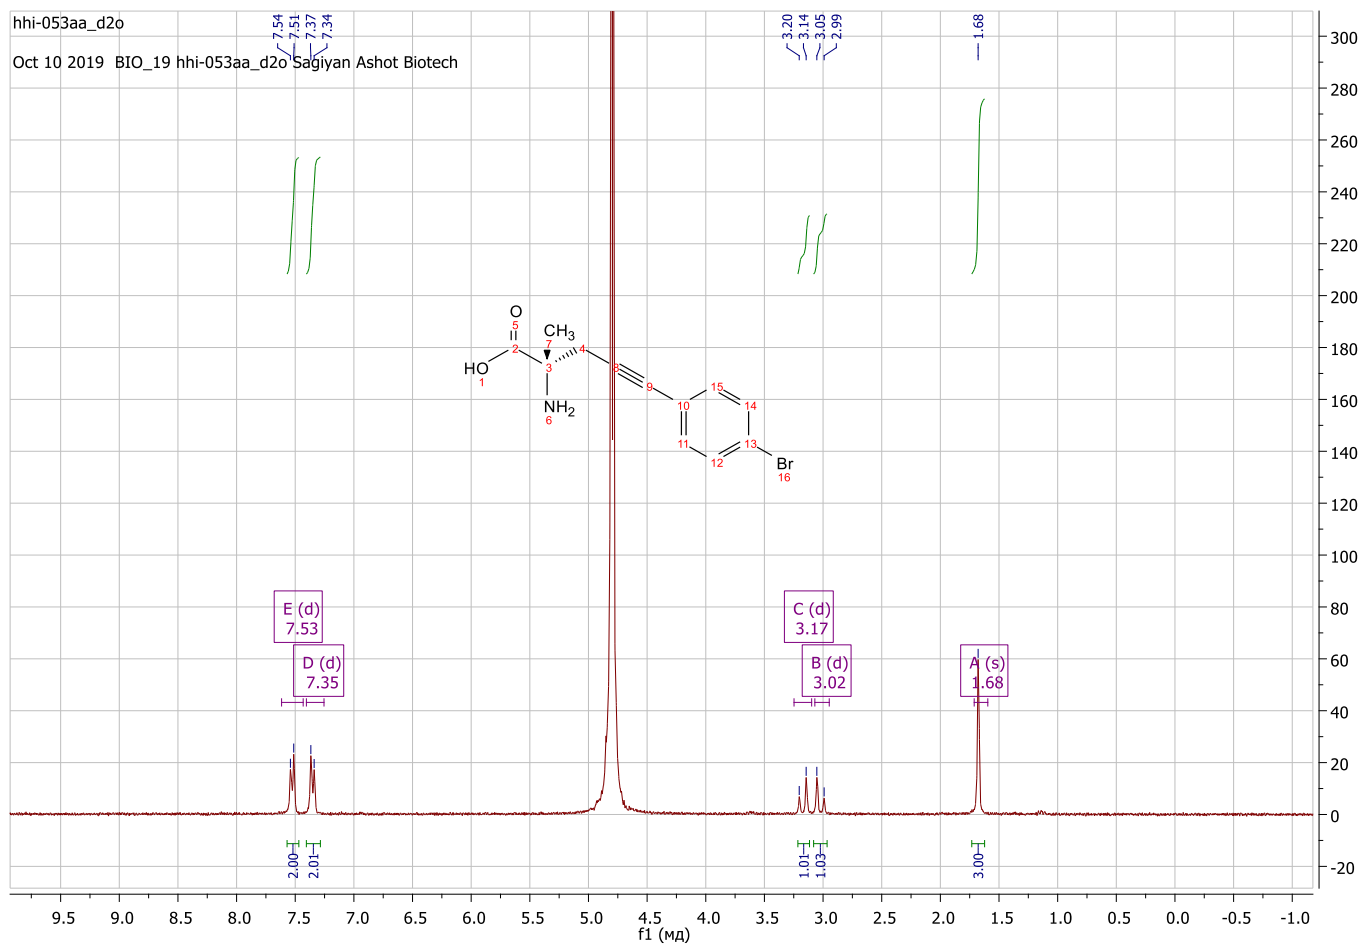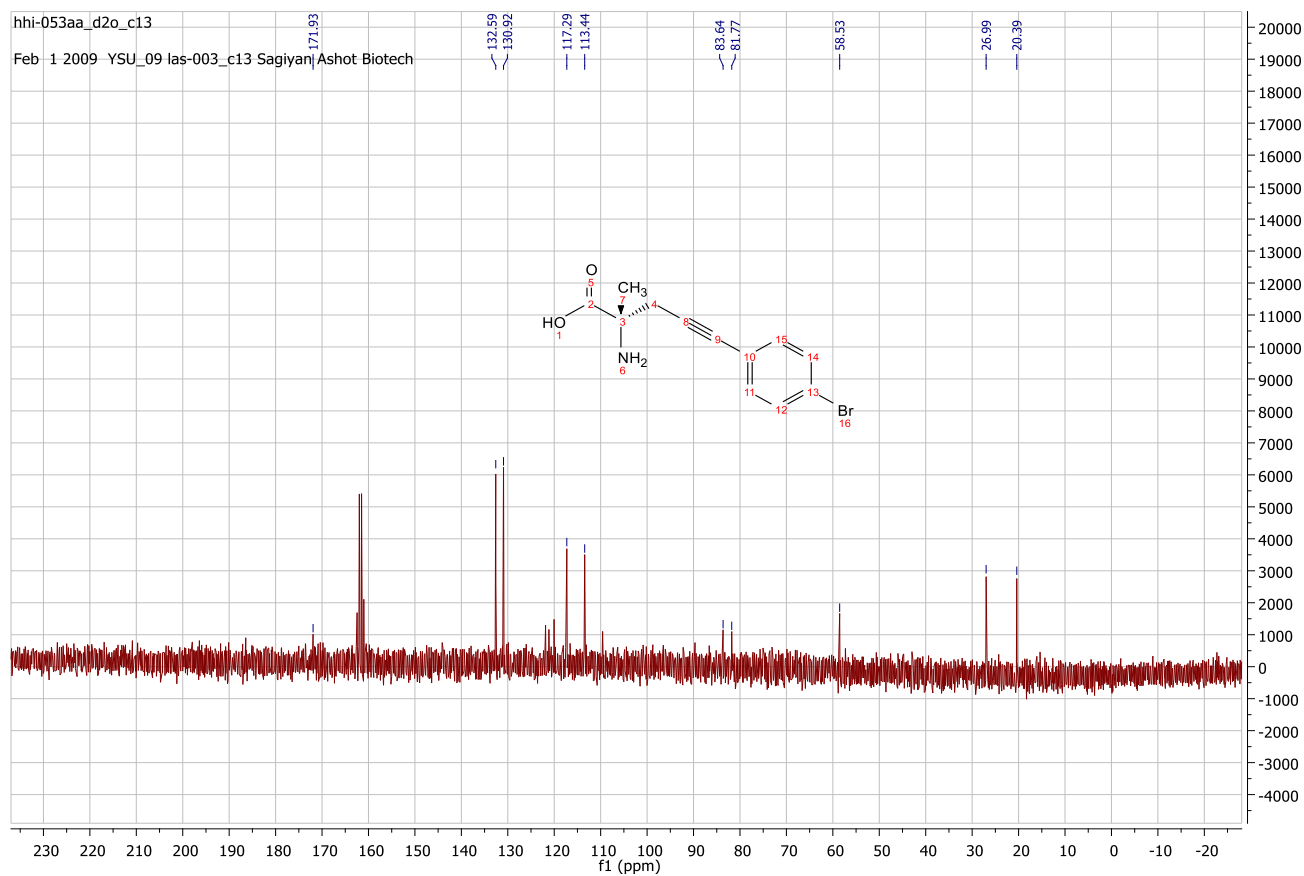

**Figure S10.** <sup>1</sup>H (300 MHz) and <sup>13</sup>C (75 MHz) NMR spectra of AA **3d** (in D<sub>2</sub>O+CF<sub>3</sub>COOD)

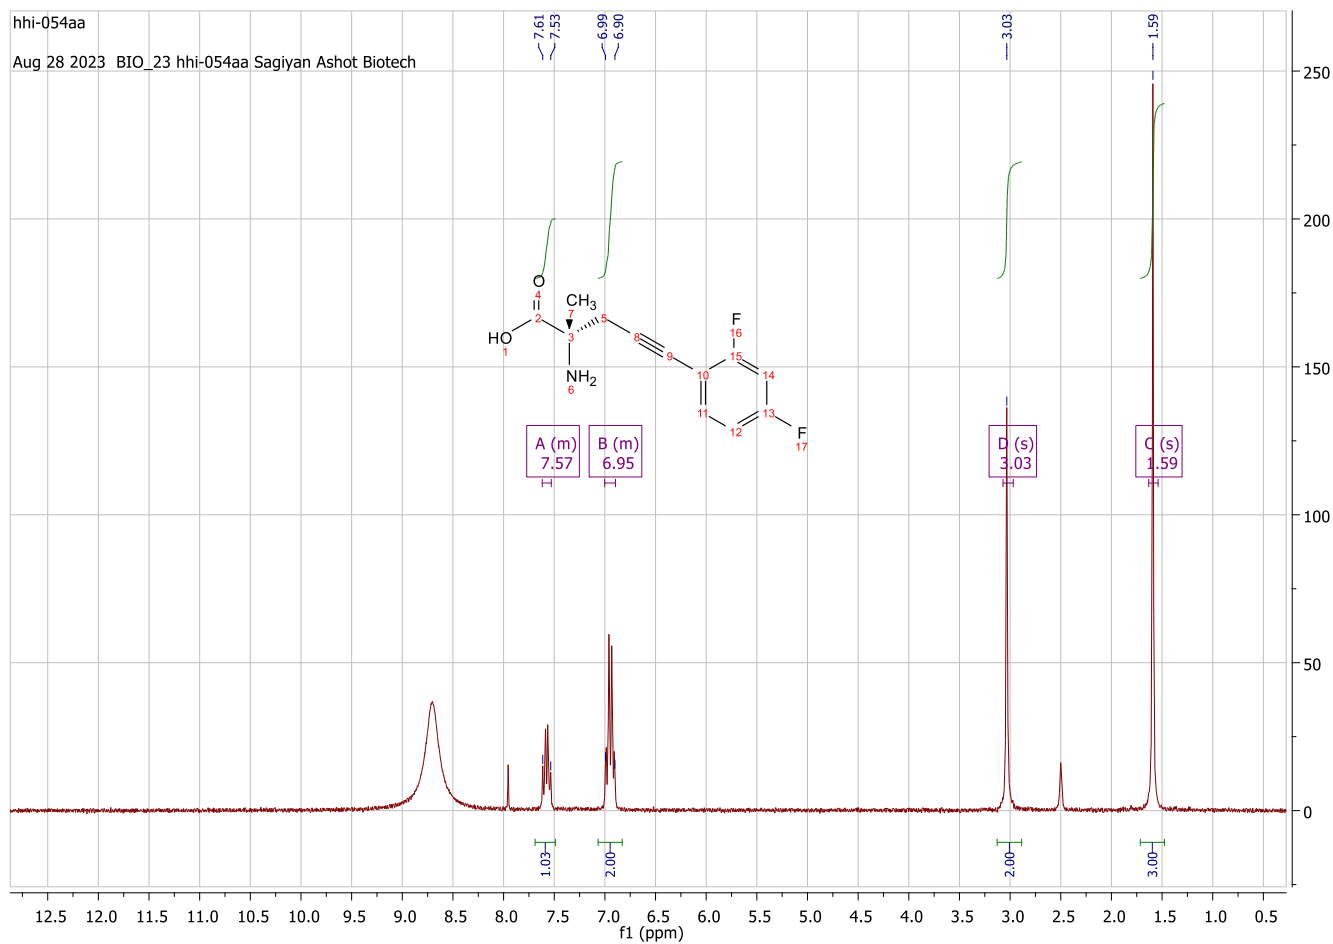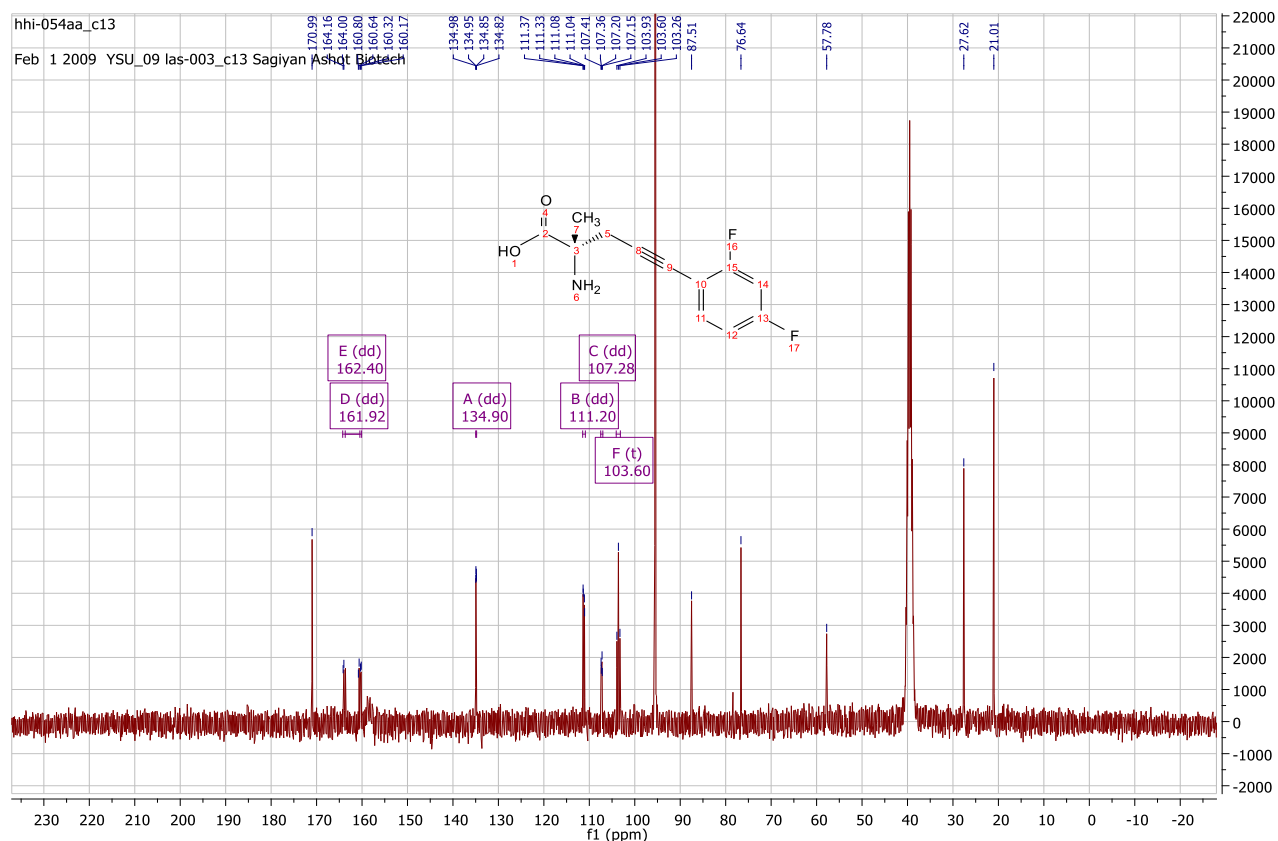

**Figure S11.** <sup>1</sup>H (300 MHz) and <sup>13</sup>C (75 MHz) NMR spectra of AA **3e** (in DMSO-d<sub>6</sub>+CF<sub>3</sub>COOD)

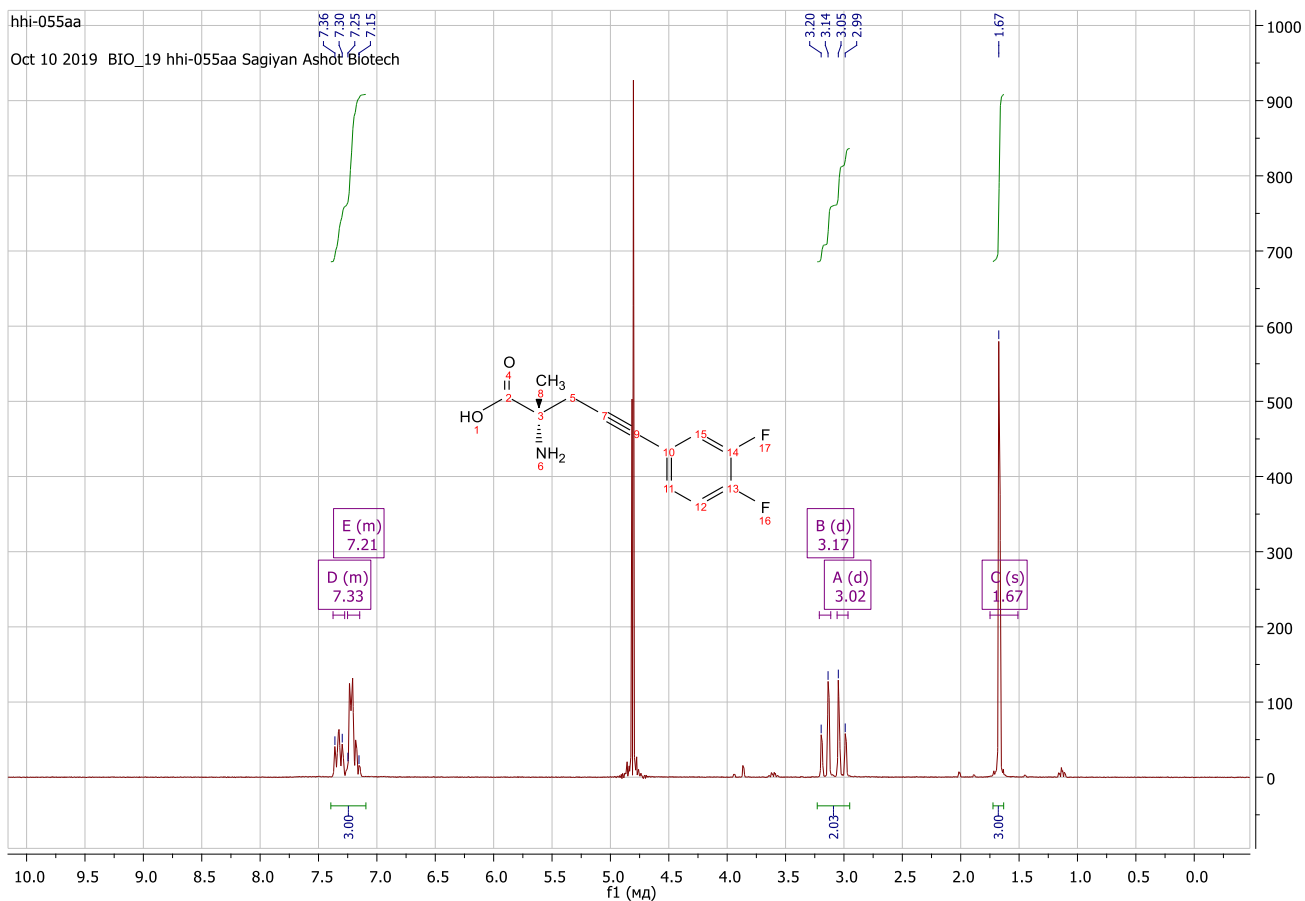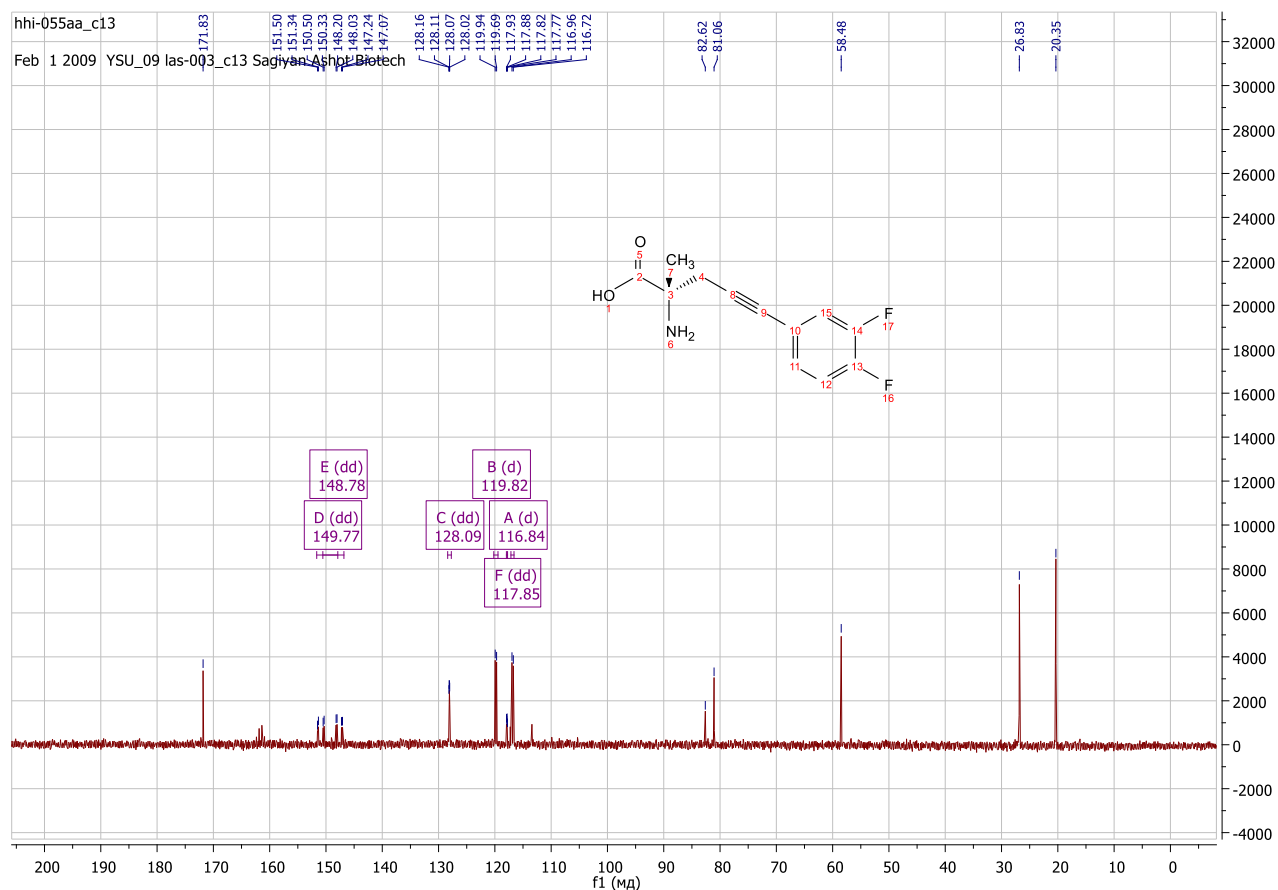

**Figure S12.**  $^1H$  (300 MHz) and  $^{13}C$  (75 MHz) NMR spectra of AA 3f (in  $D_2O+CF_3COOD$ )

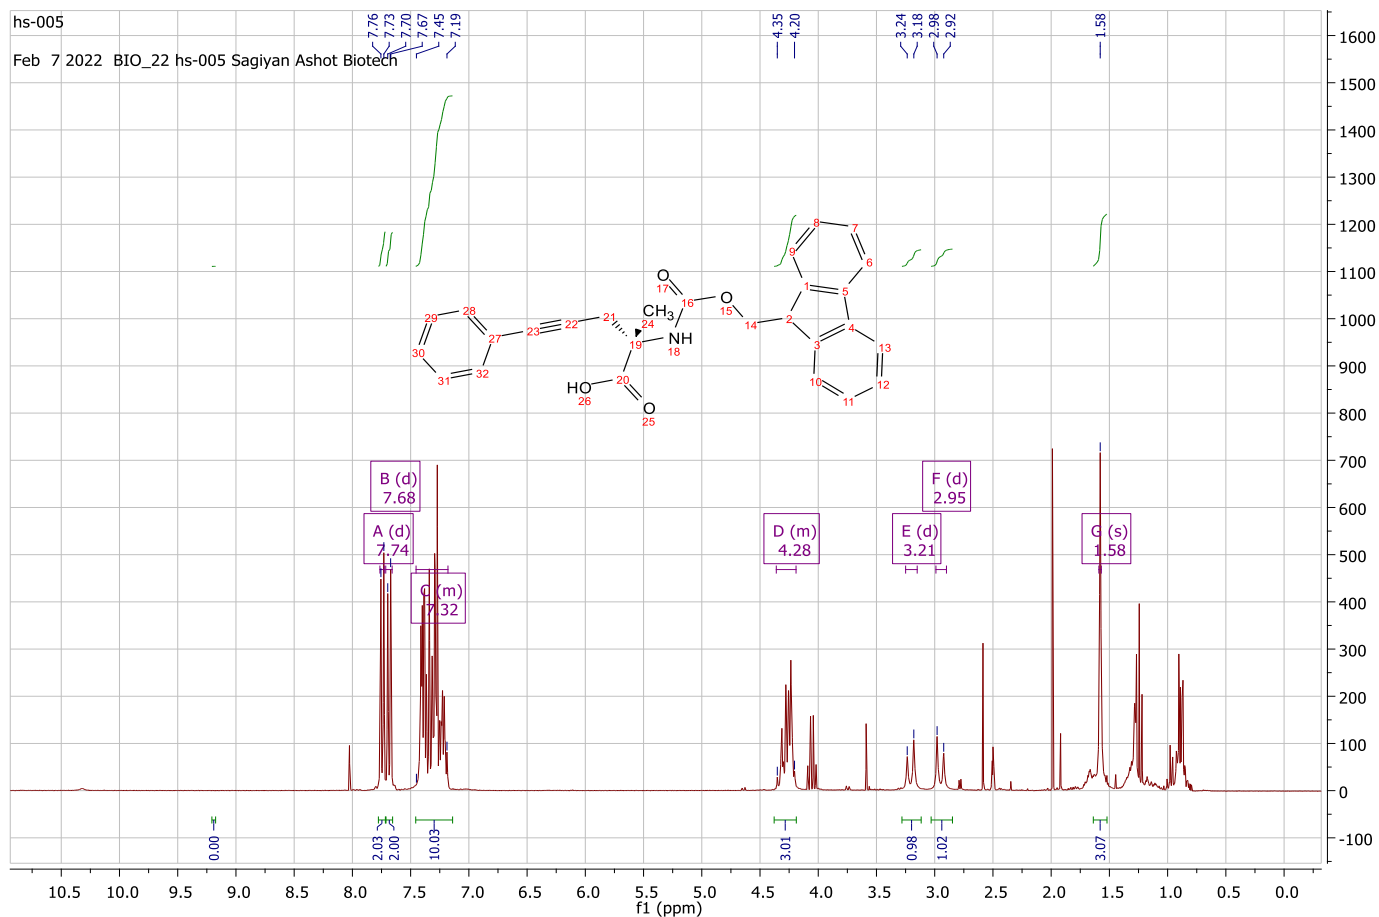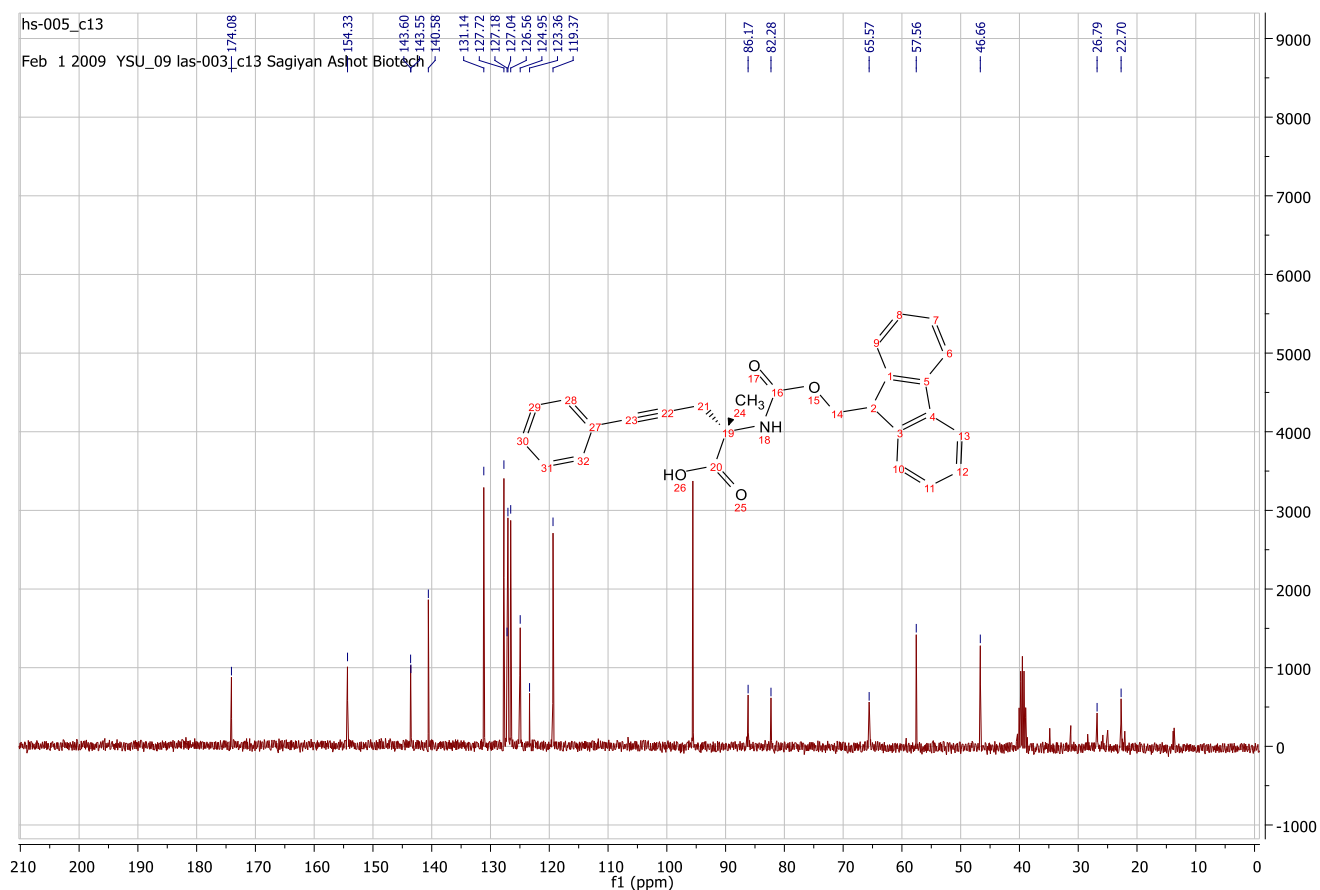

**Figure S13.**  $^1\text{H}$  (300 MHz) and  $^{13}\text{C}$  (75 MHz) NMR spectra of Fmoc-AA **4** (in DMSO- $d_6$ )

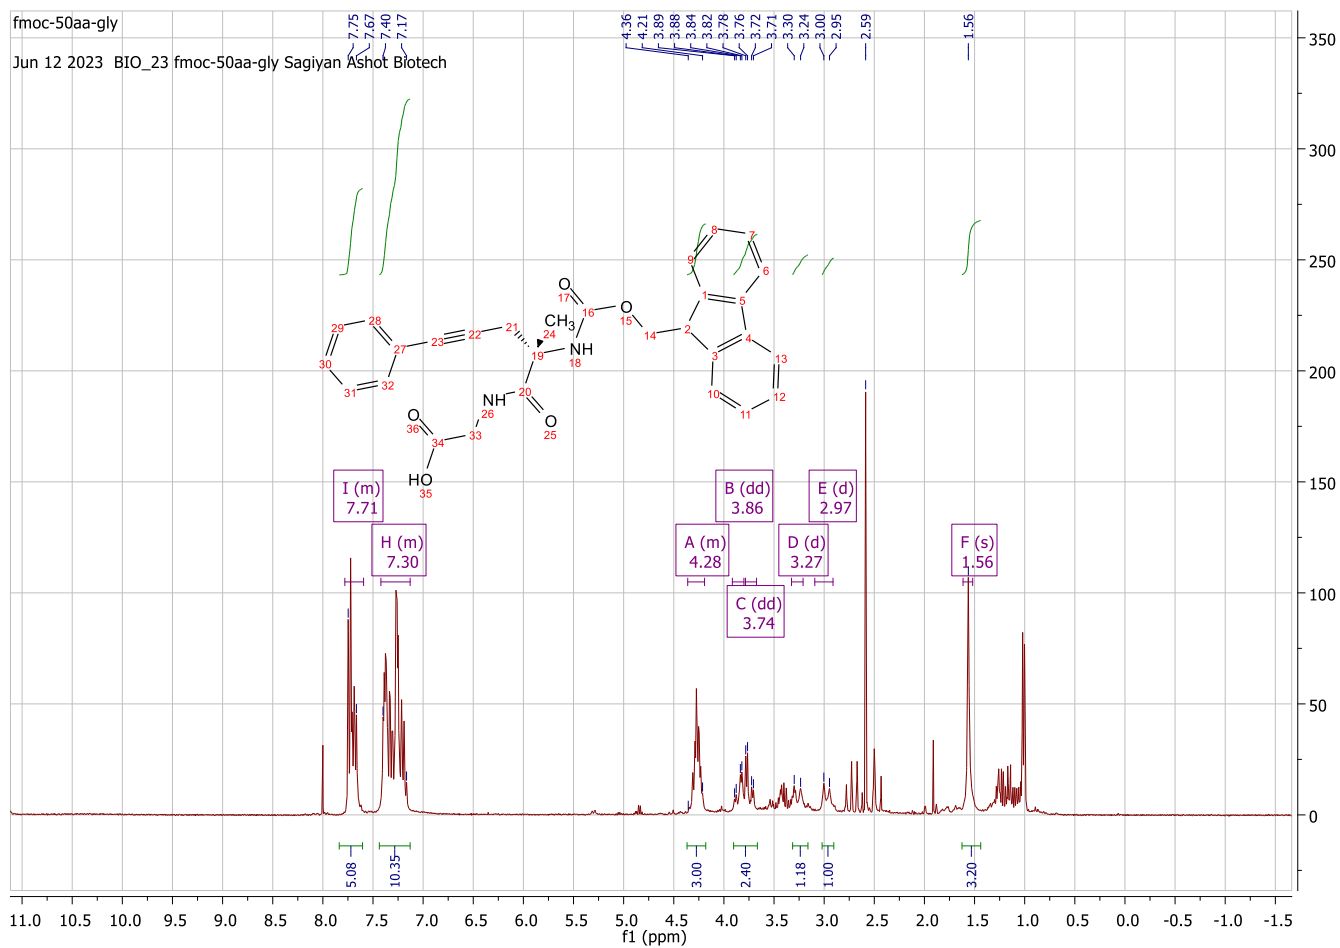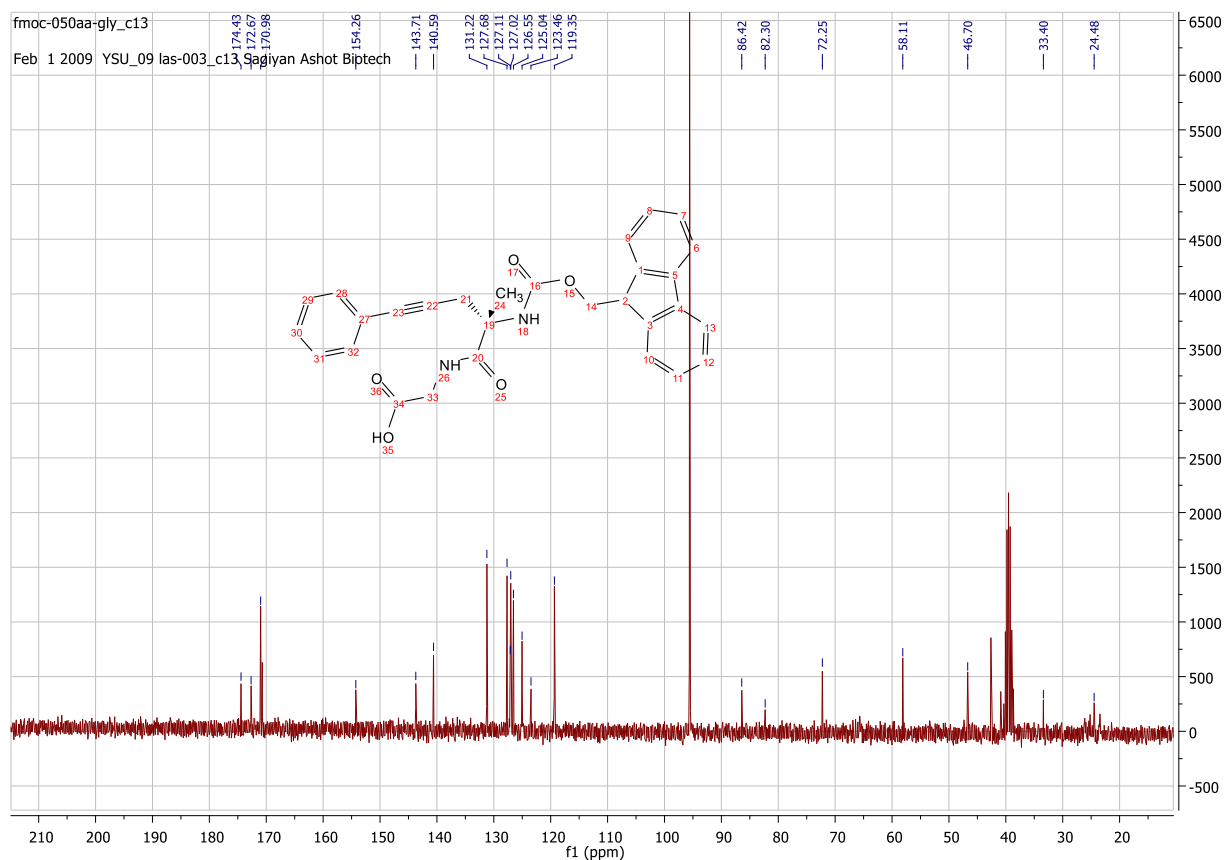

**Figure S14.** <sup>1</sup>H (300 MHz) and <sup>13</sup>C (75 MHz) NMR spectra of dipeptide **6** (in DMSO-d<sub>6</sub>)

**LABORATORY OF BIOACTIVE SUBSTANCE PURIFICATION AND CERTIFICATION**  
**SPC "Armibiotechnology" NAS RA, SNPO**

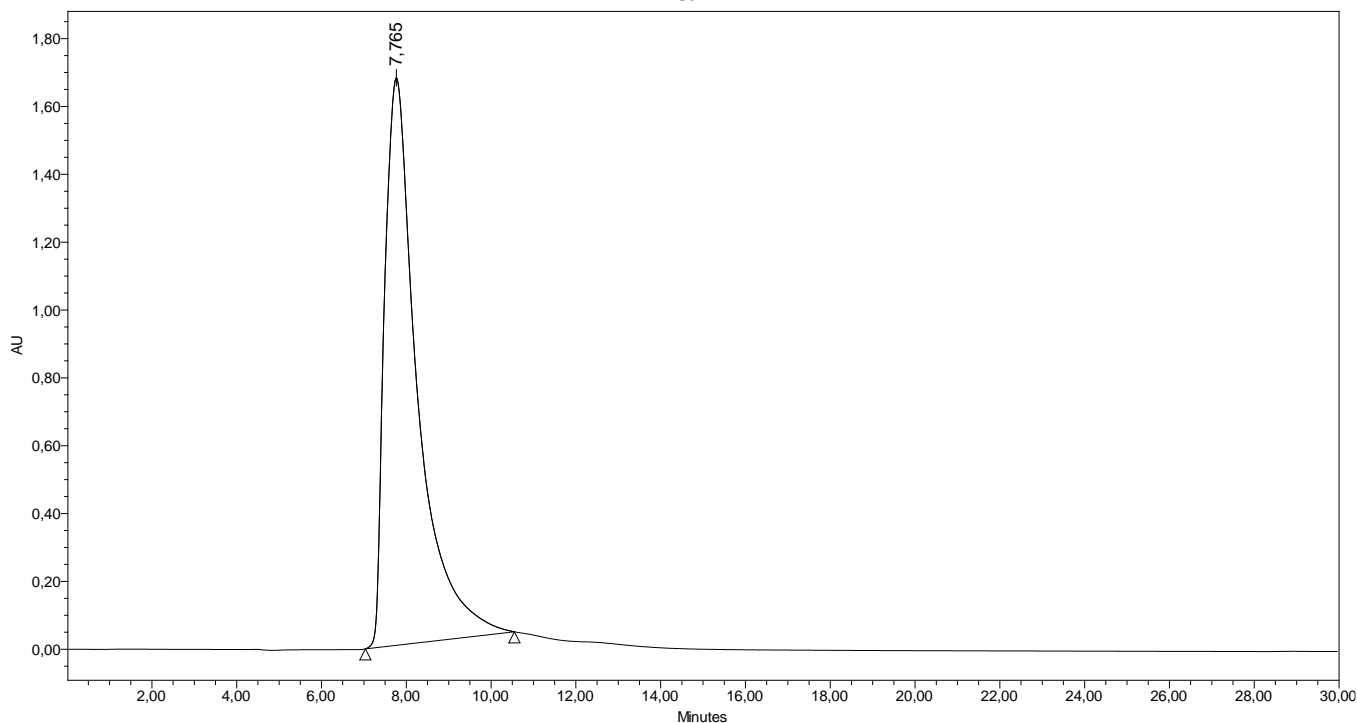

| Nº | Name                                                              | Retention Time | Area     | % Area | Height  |
|----|-------------------------------------------------------------------|----------------|----------|--------|---------|
| 1  | ( <i>S</i> )-2-amino-2-methyl-5-phenylpent-4-ynoic acid <b>3a</b> | 7,765          | 90184069 | 100,00 | 1673077 |

**Figure S15.** HPLC trace of the enantiopure AA (*S*)-**3a**

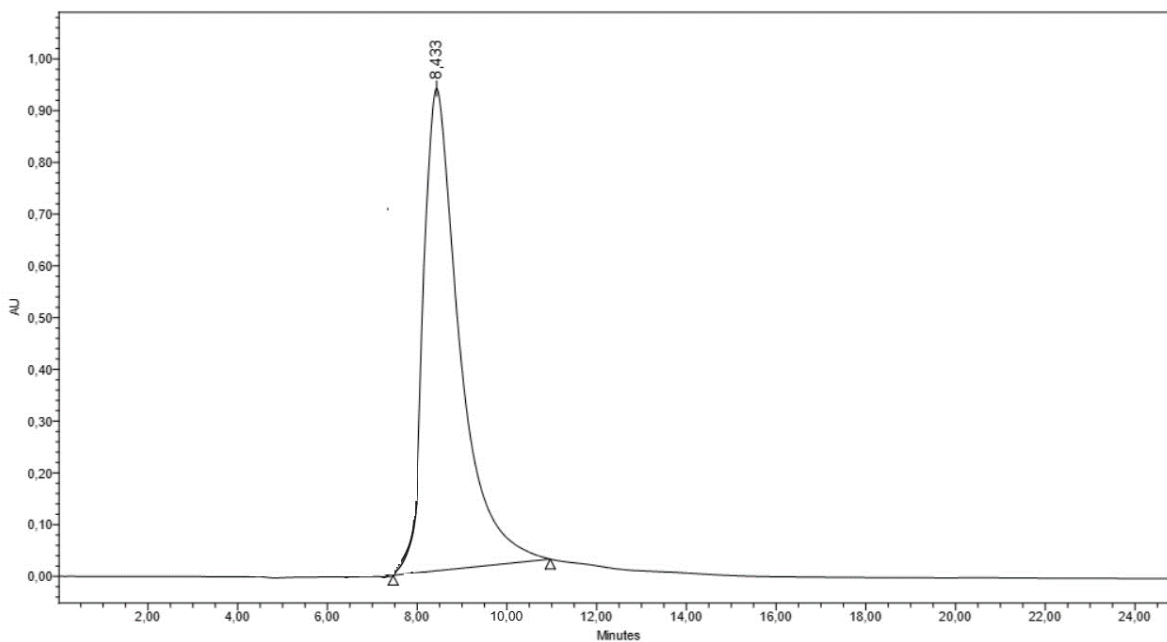

|   | Name                                                                 | Retention Time | Area     | % Area | Height |
|---|----------------------------------------------------------------------|----------------|----------|--------|--------|
| 1 | ( <i>S</i> )-2-amino-2-methyl-5-(p-tolyl)pent-4-ynoic acid <b>3b</b> | 8,433          | 51935377 | 100    | 931938 |

**Figure S16.** HPLC trace of the enantiopure AA (*S*)-**3b**

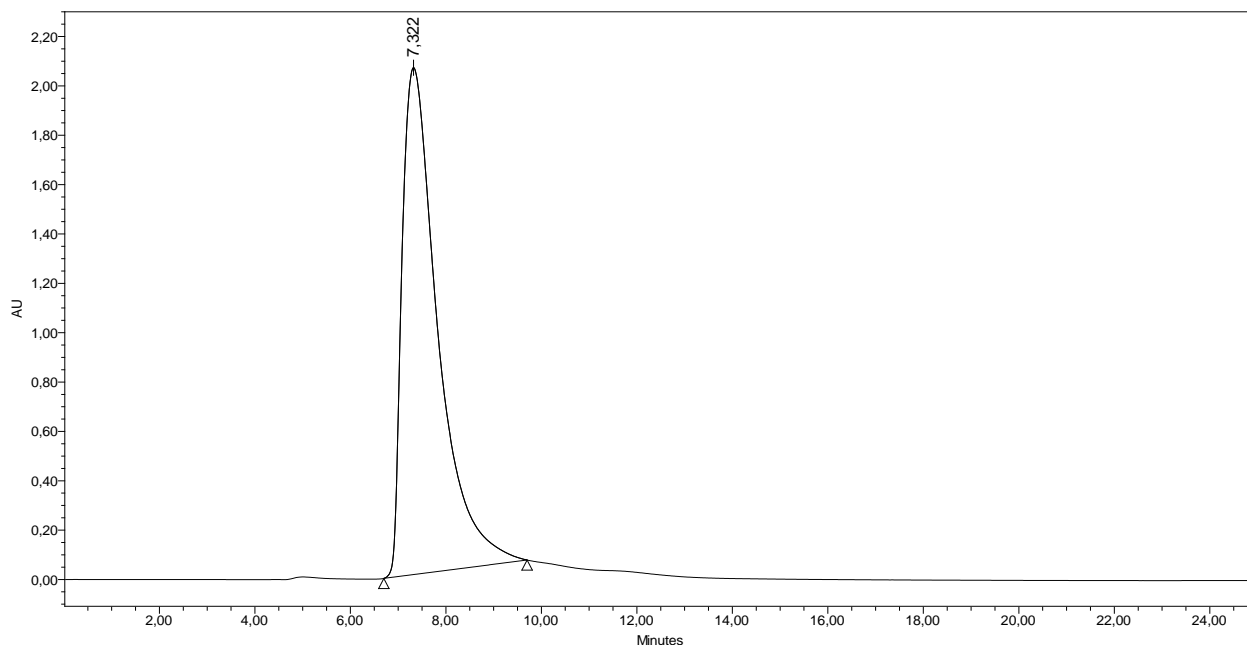

| Nº | Name                                                                        | Retention Time | Area      | % Area | Height  |
|----|-----------------------------------------------------------------------------|----------------|-----------|--------|---------|
| 1  | ( <i>S</i> )-2-amino-5-(4-fluorophenyl)-2-methylpent-4-ynoic acid <b>3c</b> | 7,322          | 107229329 | 100,00 | 2054392 |

**Figure S17.** HPLC trace of the enantiopure AA (*S*)-**3c**

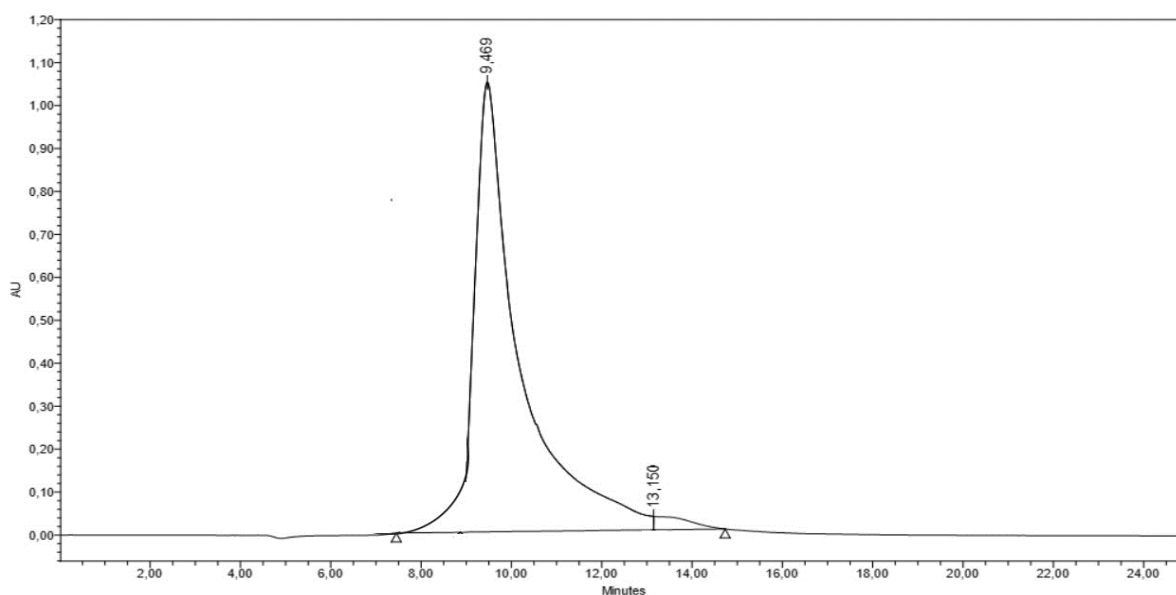

| Nº | Name                                                                       | Retention Time | Area     | % Area | Height  |
|----|----------------------------------------------------------------------------|----------------|----------|--------|---------|
| 1  | ( <i>S</i> )-2-amino-5-(4-bromophenyl)-2-methylpent-4-ynoic acid <b>3d</b> | 9,469          | 71480284 | 98,97  | 1047045 |
| 2  | ( <i>R</i> )-2-amino-5-(4-bromophenyl)-2-methylpent-4-ynoic acid <b>3d</b> | 13,150         | 1669131  | 1,03   | 31136   |

**Figure S18.** HPLC trace of the enantiopure AA (*S*)-**3d**

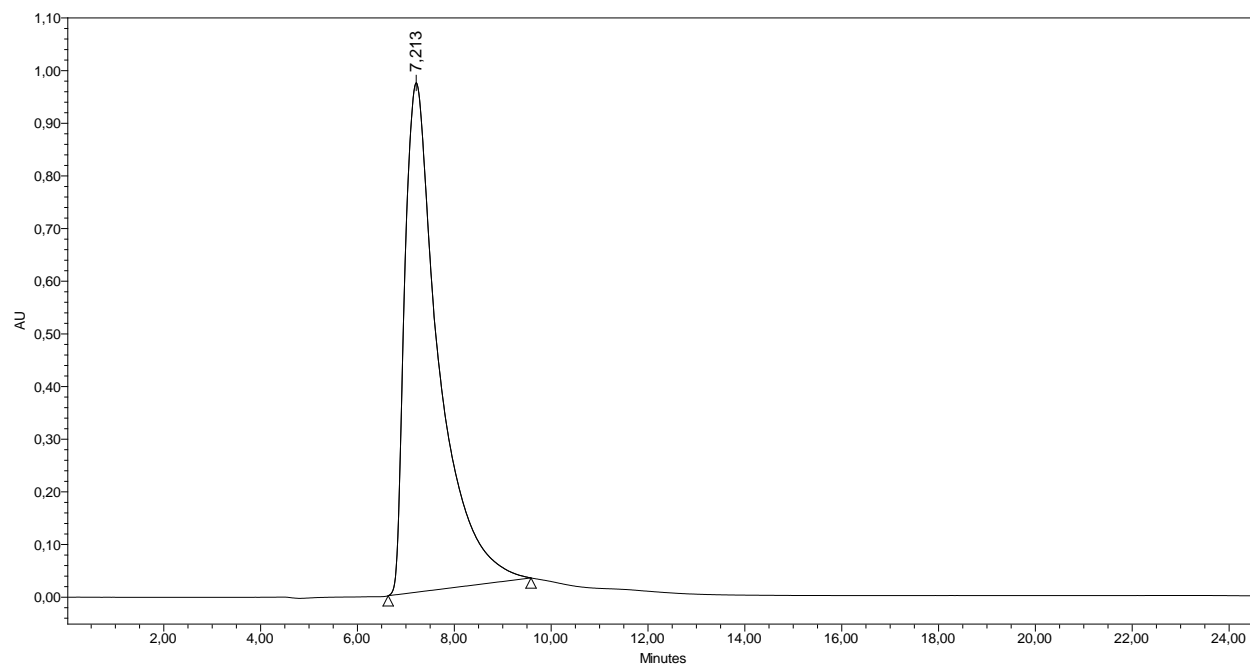

| No | Name                                                                   | Retention Time | Area     | % Area | Height |
|----|------------------------------------------------------------------------|----------------|----------|--------|--------|
| 1  | (S)-2-amino-5-(2,4-difluorophenyl)-2-methylpent-4-ynoic acid <b>3e</b> | 7,213          | 47368874 | 100,00 | 967682 |

**Figure S19.** HPLC trace of the enantiopure AA (*S*)-**3e**

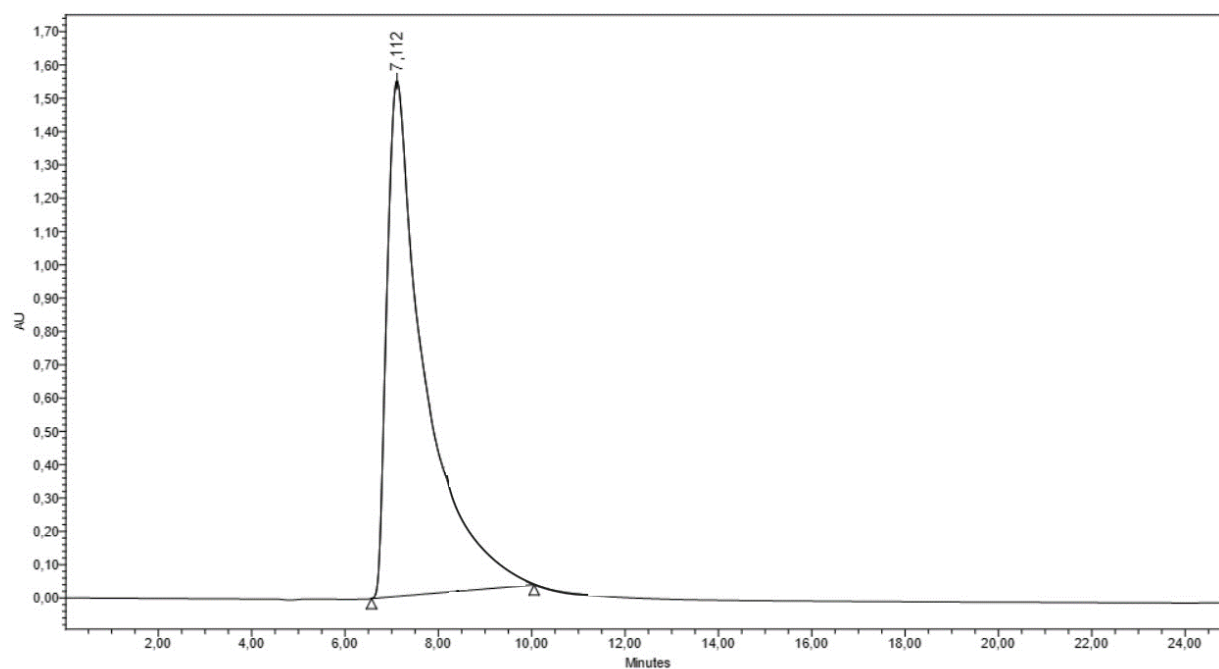

| No | Name                                                                   | Retention Time | Area     | % Area | Height  |
|----|------------------------------------------------------------------------|----------------|----------|--------|---------|
| 1  | (S)-2-amino-5-(3,4-difluorophenyl)-2-methylpent-4-ynoic acid <b>3f</b> | 7,112          | 78091517 | 100    | 1547612 |

**Figure S20.** HPLC trace of the enantiopure AA (*S*)-**3f**

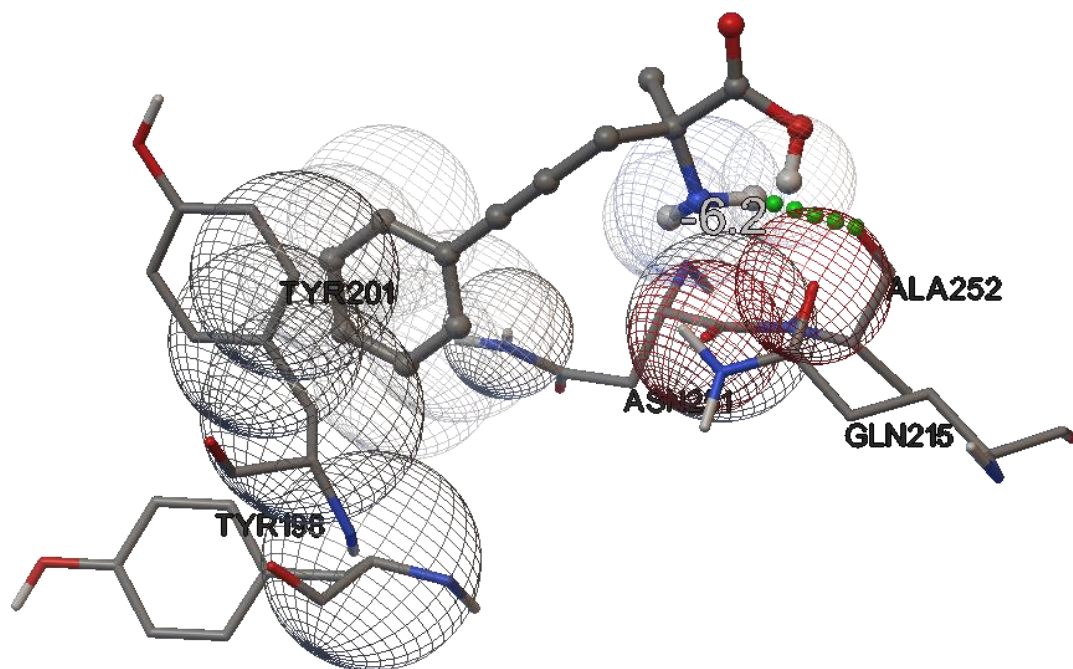

**Figure S21.** Molecular docking of the enantiopure AA (*S*)-3a

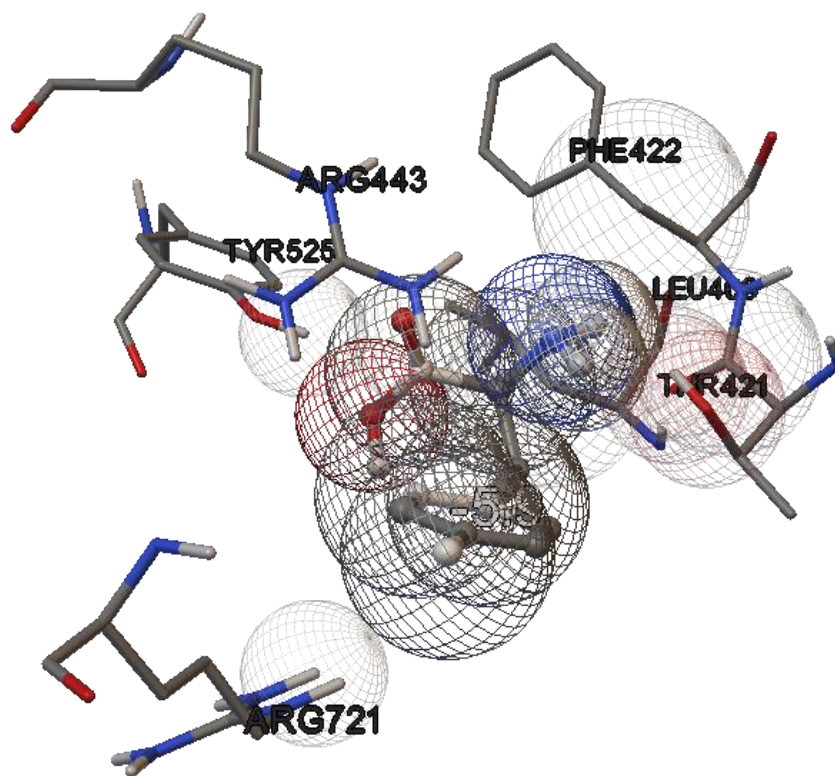

**Figure S22.** Molecular docking of the enantiopure AA (*S*)-3b

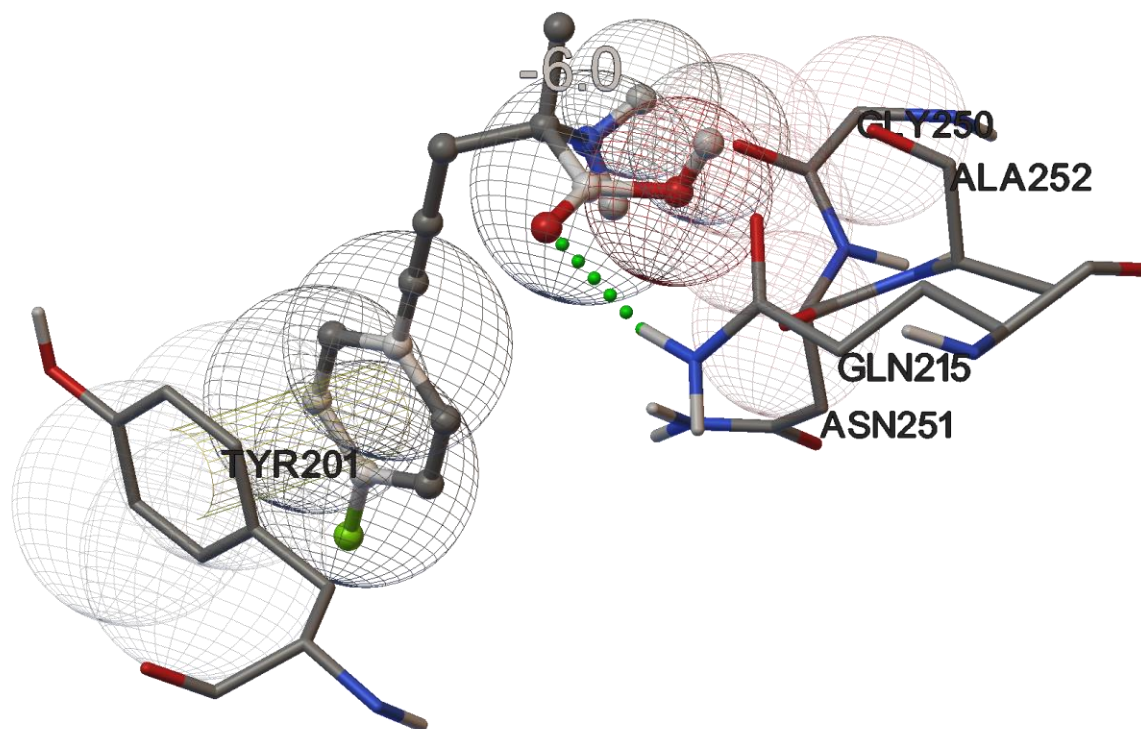

**Figure S23.** Molecular docking of the enantiopure AA (*S*)-3c

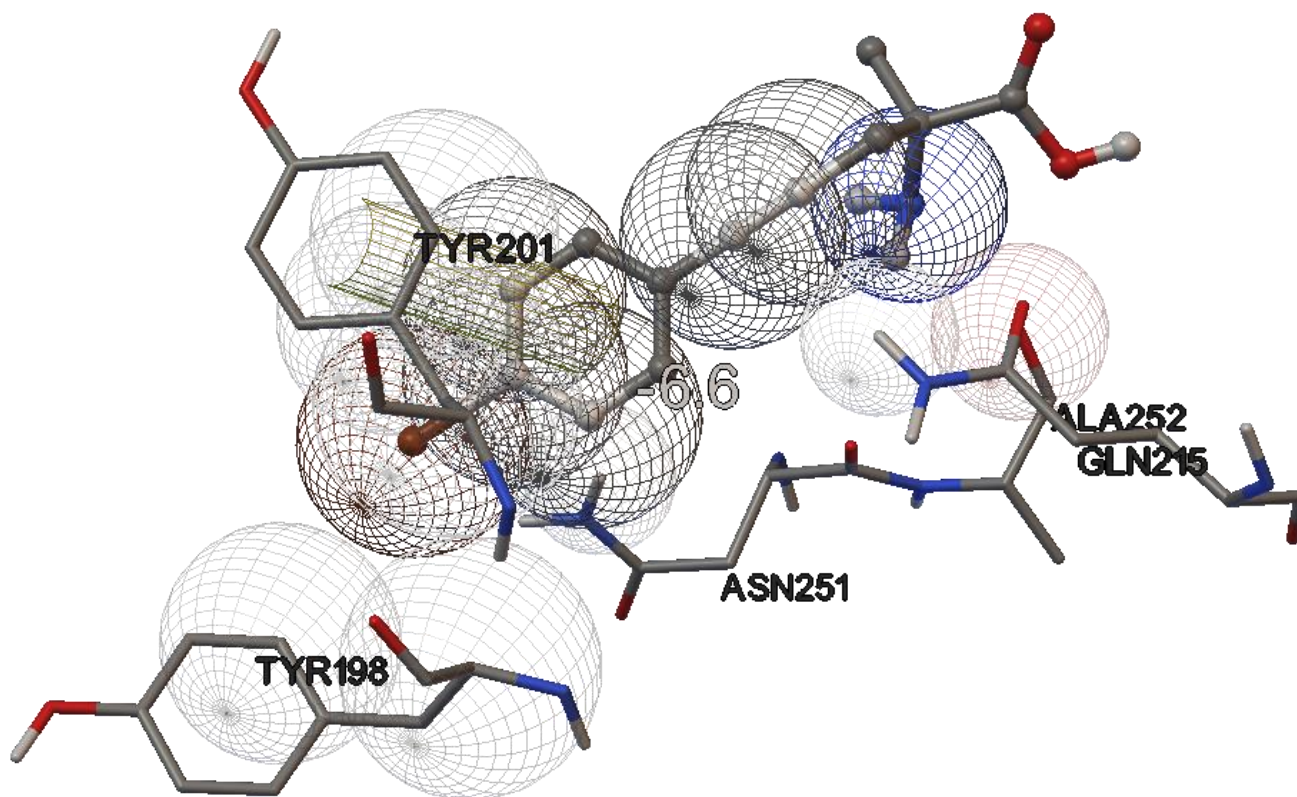

**Figure S24.** Molecular docking of the enantiopure AA (*S*)-3d

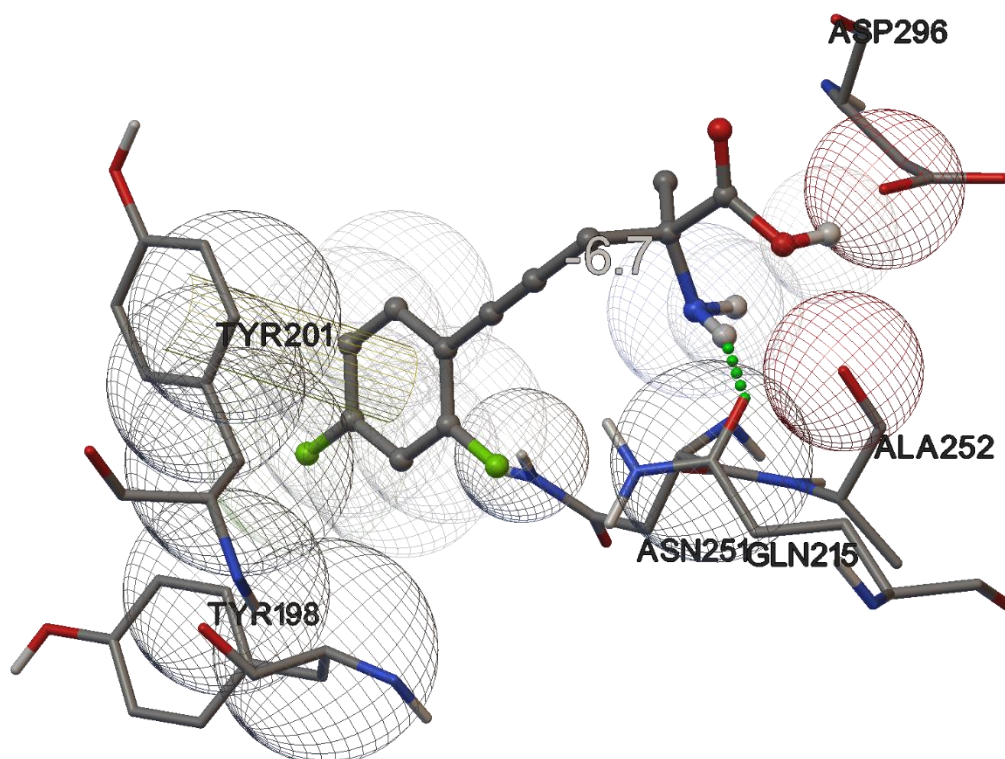

**Figure S25.** Molecular docking of the enantiopure AA (*S*)-3e

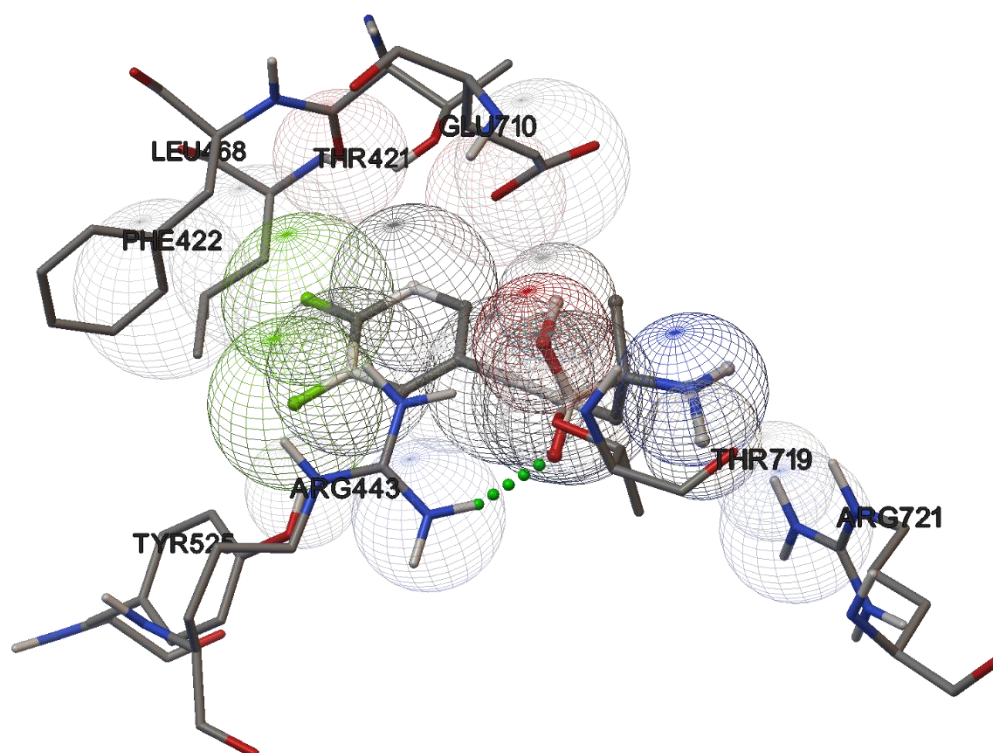

**Figure S26.** Molecular docking of the enantiopure AA (*S*)-3f

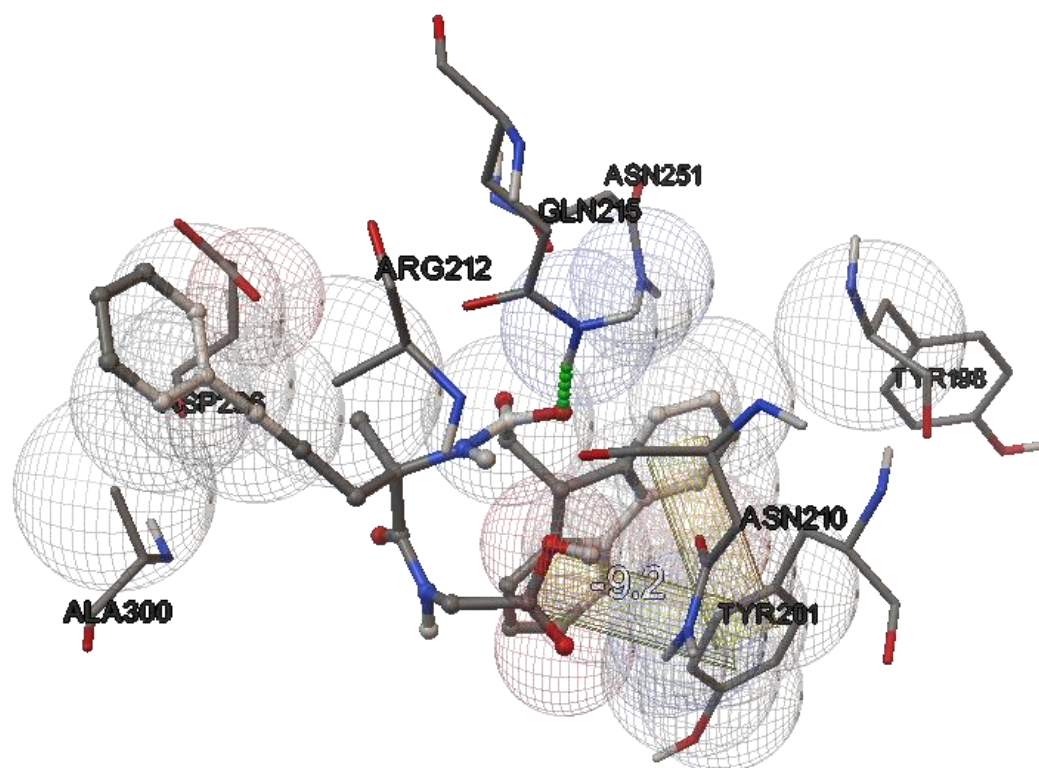

**Figure S27.** Molecular docking of the dipeptide 6
